# Supplementary material for: In vitro iCLIP-based modeling uncovers how the splicing factor U2AF2 relies on regulation by cofactors
Source: PubMed Central journal article supplement — Genome Res. 2018 May;28(5):699–713. doi: 10.1101/gr.229757.117 (PMC5932610; doi:10.1101/gr.229757.117), 2018-05
Supplement: supp_gr.229757.117_Supplemental_Fig_S2.pdf [file supp_gr.229757.117_Supplemental_Fig_S2.pdf]

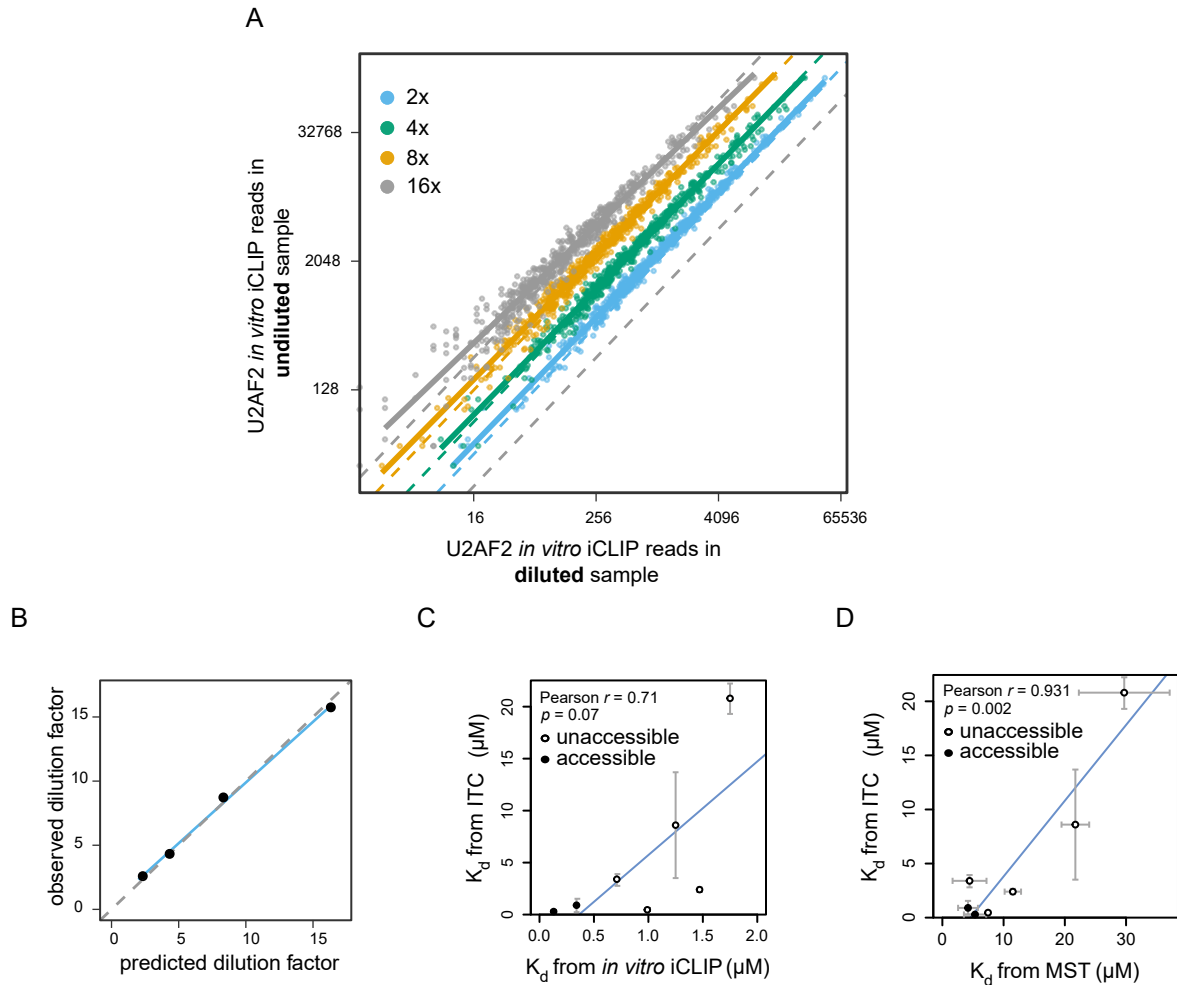

**Supplemental figure S2, related to Figure 2. The experimental measurements and mathematical modeling results are robust. (A)** The *in vitro* iCLIP signal is proportional to the amount of bound RNA. Scatter plot comparing normalized *in vitro* iCLIP read counts from serial dilutions (2x, 4x, 8x, and 16x) to the initial *in vitro* iCLIP reaction mixture (5  $\mu\text{M}$  U2AF2<sup>RRM12</sup> + 6.75 nM *in vitro* transcripts). Colored solid and dashed lines represent linear regression and expected read distributions for each dilution step, respectively. **(B)** The observed dilution factors precisely reflect the expected values for the four different dilution steps. Linear regression line indicated in blue. **(C)**  $K_d$  values from *in vitro* iCLIP are correlated with isothermal titration calorimetry (ITC) measurements for seven selected binding sites (**Supplemental Table S3**). Binding sites are marked as accessible (grey) or inaccessible (white) based on RNA fold predictions (see Methods). Pearson correlation coefficient ( $r$ ) and associated  $p$ -value indicated below. **(D)** ITC-derived  $K_d$  values correlate well with MST measurements, but differ on absolute terms. ITC- $K_d$  values are on average 2-fold lower than MST- $K_d$ 's, and thereby more closely reflect the *in vitro* iCLIP-derived  $K_d$  values for the same binding sites.
