# Supplementary material for: In vitro iCLIP-based modeling uncovers how the splicing factor U2AF2 relies on regulation by cofactors
Source: PubMed Central journal article supplement — Genome Res. 2018 May;28(5):699–713. doi: 10.1101/gr.229757.117 (PMC5932610; doi:10.1101/gr.229757.117), 2018-05
Supplement: supp_gr.229757.117_Supplemental_Fig_S3.pdf [file supp_gr.229757.117_Supplemental_Fig_S3.pdf]

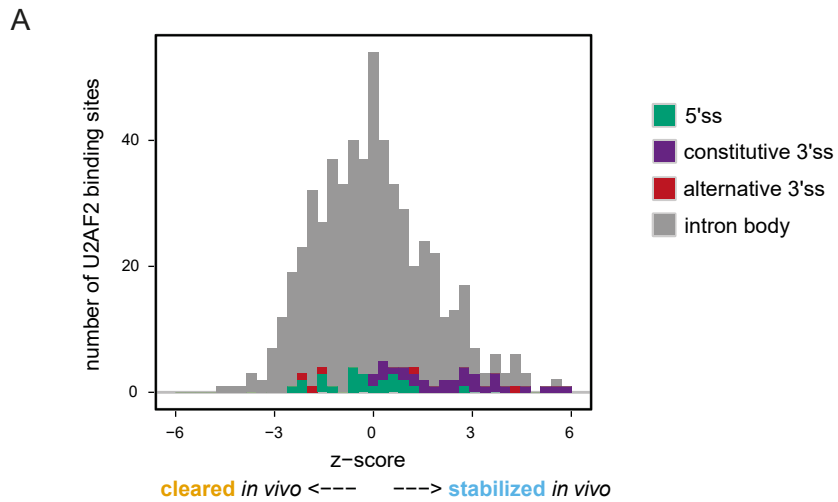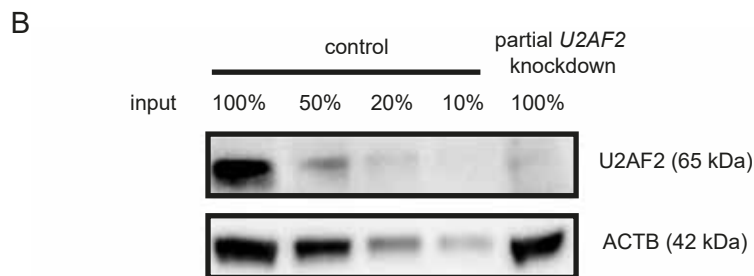

**Supplemental figure S3, related to Figure 3. U2AF2 binding sites are highly regulated *in vivo*.** (A) Histogram showing the distribution of differences between *in vivo* and *in vitro* U2AF2 binding landscapes (z-score) for binding sites in different transcript regions. Binding sites with z-score > 0 are stabilized *in vivo*, while binding sites with z-score < 0 are cleared *in vivo*. (B) U2AF2 is depleted to ~20% upon partial *U2AF2* knockdown. Western blot illustrating the U2AF2 protein level upon partial *U2AF2* knockdown. Actin beta (ACTB) was used as loading control.
