# Supplementary material for: In vitro iCLIP-based modeling uncovers how the splicing factor U2AF2 relies on regulation by cofactors
Source: PubMed Central journal article supplement — Genome Res. 2018 May;28(5):699–713. doi: 10.1101/gr.229757.117 (PMC5932610; doi:10.1101/gr.229757.117), 2018-05
Supplement: supp_gr.229757.117_Supplemental_Fig_S4.pdf [file supp_gr.229757.117_Supplemental_Fig_S4.pdf]

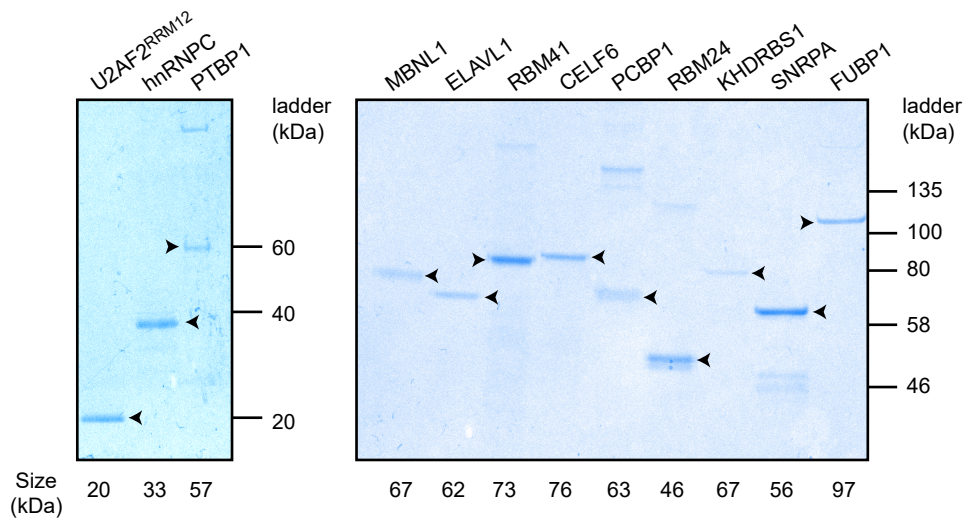

**Supplemental figure S4, related to Figure 4 and 5. Recombinant proteins used in *in vitro* iCLIP experiments were visualized on SDS-PAGE.** Gel image of recombinant proteins run on 6-12% Bis-Tris protein gels using the NuPAGE system. Arrowheads indicate bands at the expected size of the proteins.
