# Supplementary material for: In vitro iCLIP-based modeling uncovers how the splicing factor U2AF2 relies on regulation by cofactors
Source: PubMed Central journal article supplement — Genome Res. 2018 May;28(5):699–713. doi: 10.1101/gr.229757.117 (PMC5932610; doi:10.1101/gr.229757.117), 2018-05
Supplement: supp_gr.229757.117_Supplemental_Fig_S5.pdf [file supp_gr.229757.117_Supplemental_Fig_S5.pdf]

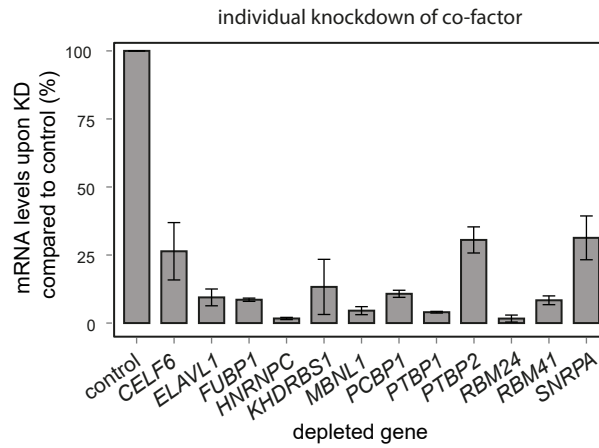

**Supplemental figure S5, related to Figure 6 and 7. Knockdowns of twelve different RBPs measured with qRT-PCR.** Bar chart showing the levels of RBP-encoding mRNAs upon knockdown of the respective RBPs in comparison to control siRNA-treated HeLa cells. Error bars represent standard deviation of the mean (n=3). *PTBP1* and *PTBP2* were depleted simultaneously as double knockdowns.
