# Supplementary material for: In vitro iCLIP-based modeling uncovers how the splicing factor U2AF2 relies on regulation by cofactors
Source: PubMed Central journal article supplement — Genome Res. 2018 May;28(5):699–713. doi: 10.1101/gr.229757.117 (PMC5932610; doi:10.1101/gr.229757.117), 2018-05
Supplement: supp_gr.229757.117_Supplemental_Fig_S6.pdf [file supp_gr.229757.117_Supplemental_Fig_S6.pdf]

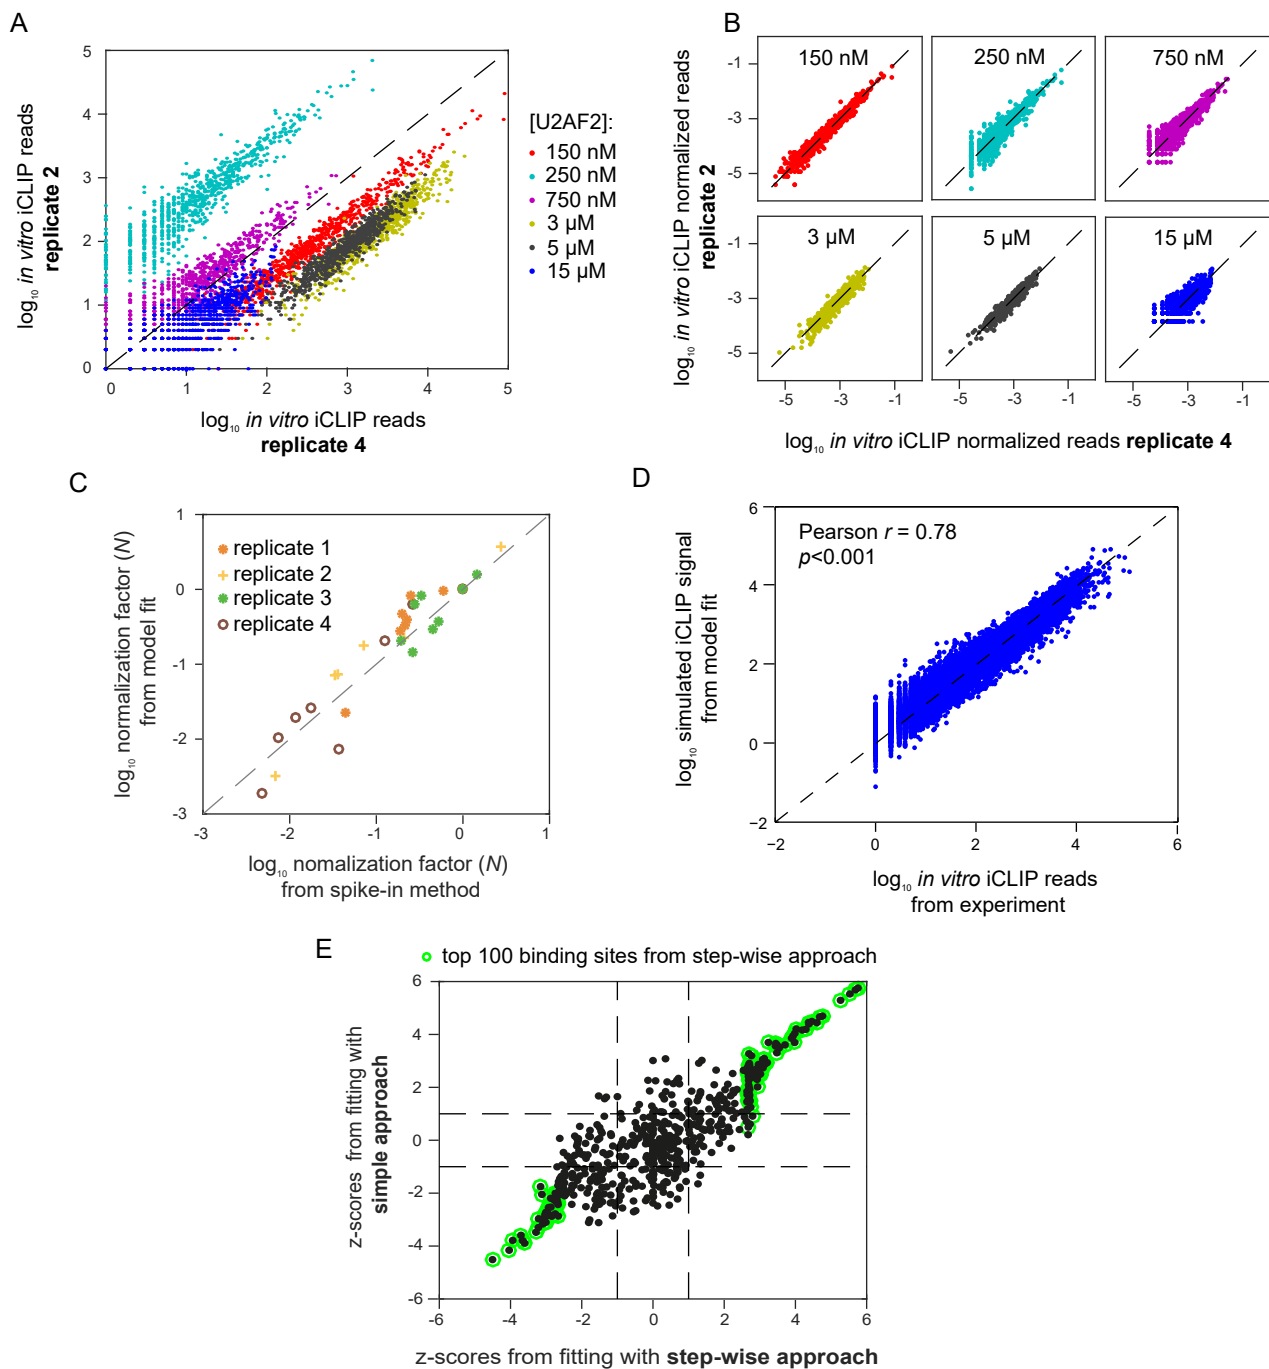

**Supplemental figure S6, related to Supplementary Methods. The mathematical model quantitatively describes U2AF2 binding. (A)** *In vitro* iCLIP signal is well correlated between replicates. Scatter plot showing correlation of  $\log_{10}$ -transformed non-normalized *in vitro* iCLIP read counts from replicates 2 and 4 of the  $K_d$  titration experiment. Different concentrations of added U2AF2<sup>RRM12</sup> are indicated by colors. **(B)** Comparison of the same replicate samples as in (A) after normalization to the total number of reads within each library (**Supplemental Table S7**). **(C)** Normalization factors ( $N$ ) estimated from the model fit and a *NUP133* spike-in control are well correlated in quadruplicate experiments. All normalization factors are given on  $\log_{10}$ -transformed scale relative to the normalization factor for the lowest U2AF2<sup>RRM12</sup> concentration in each replicate. **(D)** Best-fit model accurately describes the experimental data. Scatter plot showing correlation between  $\log_{10}$ -transformed measured and simulated *in vitro* iCLIP signals (arbitrary units) for all U2AF2<sup>RRM12</sup> concentrations and replicate experiments. Pearson correlation coefficients ( $r$ ) are given at the top. **(E)** Scatter plot showing correlation of z-scores for *in vivo* regulated U2AF2 binding sites defined by the simple and step-wise fitting approaches. Green circles indicate top 100 binding sites according to ranked z-scores from the step-wise fitting approach.
