# Supplementary material for: In vitro iCLIP-based modeling uncovers how the splicing factor U2AF2 relies on regulation by cofactors
Source: HighWire-hosted journal article supplement (doi:10.1101/gr.229757.117), 2018-04-11
Supplement: Supplemental_Table_S1.docx [file Supplemental_Table_S1.docx]

**Supplemental Table S1. List of eleven *in vitro* transcripts used in *in vitro* iCLIP experiments.** Each of the *in vitro* transcripts represents part of an endogenous human transcript. Genomic coordinates and length of each *in vitro* transcript are indicated. Note that the *CD55* *in vitro* transcript omits part of the third intron. The *NUP133 in vitro* transcript was used as a spike-in control in the *in vitro* iCLIP titration experiments.

| **Gene** | **Chromosome** | **Coordinates** | **Strand** | **Length (nt)** |
| --- | --- | --- | --- | --- |
| *PTBP2* | Chr1 | 97269727:97272451 | + | 2,725 |
| *MAT2A* | Chr2 | 85768258:85769891 | + | 1,634 |
| *MIRLET7A2* | Chr11 | 122016777:122018959 | - | 2,183 |
| *MALAT1* | Chr 1 | 65266455:65273637 | + | 7,182 |
| *CD55* | Chr1 | 207512678:207515236 | + | 3,929 |
| 207531777:207533146 |
| *PCBP2* | Chr12 | 53860746:53862697 | + | 1,952 |
| *NF1* | Chr17 | 29546069:29550475 | + | 4,407 |
| *PAPD4* | Chr5 | 78936269:78938704 | + | 2,436 |
| *C4BPB* | Chr1 | 207267907:207270214 | + | 2,308 |
| *MYL6* | Chr12 | 56552950:56555247 | + | 2,298 |
| *MYC* | Chr8 | 128750313:128752817 | + | 2,505 |
| *NUP133* | Chr1 | 229601167:229602503 | - | 1,336 |
