# Supplementary material for: In vitro iCLIP-based modeling uncovers how the splicing factor U2AF2 relies on regulation by cofactors
Source: HighWire-hosted journal article supplement (doi:10.1101/gr.229757.117), 2018-04-11
Supplement: Supplemental_Table_S2.xlsx [file Supplemental_Table_S2.xlsx]

## Sheet: Sheet1
Supplemental Table S2. List of 795 U2AF2 binding sites in the eleven in vitro transcripts. Genomic coordinates of all U2AF2 binding sites are indicated. For each binding site, the in vitro iCLIP-derived Kd value is given with the 95% confidence interval boundaries and the scaling factor identified from modeling (see Supplemental Material). z-scores from the best-fit of in vivo and in vitro bindin…
Binding site No.	Chromosome	Start	End	Transcript	Sequence	Estimated Kd (µM)	Lower Boundary: 95% Confidence Interval	Upper Boundary: 95% Confidence Interval	Scaling factor (*1.0e+06)	z-score
1	Chr1	207512702	207512710	CD55	AATTTTTGT	1.85	0.89	3.83	26.9	-3.1638
2	Chr1	207512718	207512726	CD55	CCTTTTTTT	0.66	0.32	1.37	14.42	0.251
3	Chr1	207512728	207512736	CD55	CCCTTCGTC	0.62	0.3	1.28	2.17	2.9128
4	Chr1	207512776	207512784	CD55	TCAGGCCAT	6.51	2.62	19.43	1.49	2.6877
5	Chr1	207512793	207512801	CD55	ATTGTTTTC	3.37	1.63	8.4	3.71	1.218
6	Chr1	207512818	207512826	CD55	TCCATATTC	10.6	4.26	37.97	3.69	1.02
7	Chr1	207512834	207512842	CD55	ATAATATTG	5.07	2.44	12.61	5.72	-0.7602
8	Chr1	207512844	207512852	CD55	CTTCTTGTT	8.37	3.36	29.98	11.28	0.1111
9	Chr1	207512874	207512882	CD55	ATTTATTTT	4.55	2.2	11.33	16.85	1.3907
10	Chr1	207512887	207512895	CD55	CTTTTTAGT	4.54	2.19	11.3	4.24	1.88
11	Chr1	207512904	207512912	CD55	CTTTAAACG	14.7	5.91	75.87	3.2	2.3406
12	Chr1	207512967	207512975	CD55	GCAATTTTC	0.63	0.25	1.32	3.57	0.1453
13	Chr1	207512992	207513000	CD55	CTTCACCCA	1.21	0.58	2.51	2.26	0.0865
14	Chr1	207513042	207513050	CD55	CATTTCCTT	1.82	0.88	3.77	7.44	-1.2184
15	Chr1	207513052	207513060	CD55	ATAAACATT	21.66	7.25	830.2	13.41	-1.6498
16	Chr1	207513115	207513123	CD55	GTAATTCCT	1.95	0.94	4.04	3.57	-1.2841
17	Chr1	207513224	207513232	CD55	TATTTTGTT	4.31	2.08	10.73	1.84	1.921
18	Chr1	207513290	207513298	CD55	ATTATTTTT	15.38	5.15	114.28	7.28	1.4509
19	Chr1	207513308	207513316	CD55	AAACATTTT	3.46	1.67	8.61	4.51	1.6785
20	Chr1	207513322	207513330	CD55	CTTTCTTCT	1.28	0.62	2.66	8.42	0.6044
21	Chr1	207513409	207513417	CD55	CTTCTATCT	16.62	5.57	123.5	8.28	-1.3235
22	Chr1	207513423	207513431	CD55	TATGTTTAT	4.1	1.98	10.21	2.34	3.0546
23	Chr1	207513446	207513454	CD55	GTCTCTTCA	0.51	0.21	1.06	2.47	0.4253
24	Chr1	207513474	207513482	CD55	ACTTTTCTC	0.37	0.15	0.77	6.11	-1.3651
25	Chr1	207513498	207513506	CD55	ACATTCTTC	6.16	2.48	18.39	17.7	-2.0527
26	Chr1	207513523	207513531	CD55	AACTTTTTT	2.45	1.18	6.1	5.53	0.5271
27	Chr1	207513563	207513571	CD55	TTTGTCTTT	8.12	3.26	29.08	11.71	-1.8197
28	Chr1	207513583	207513591	CD55	TATTTCATT	2.16	1.04	4.47	5	-1.143
29	Chr1	207513640	207513648	CD55	TTTATTCTT	0.96	0.46	1.99	4.84	-0.3656
30	Chr1	207513686	207513694	CD55	TTTGTTTTC	1.83	0.88	4.55	3.98	-2.0227
31	Chr1	207513696	207513704	CD55	TTCTTTTCT	0.27	0.09	0.67	9.63	-2.2613
32	Chr1	207513714	207513722	CD55	TTTTATTTT	0.1	0.08	0.17	36.08	-1.7087
33	Chr1	207513724	207513732	CD55	TTTTTGAGA	0.1	0.08	0.17	8.6	-1.5668
34	Chr1	207513875	207513883	CD55	TAAGTTTTT	2.7	1.3	5.6	4.09	0.0848
35	Chr1	207513887	207513895	CD55	ATTTATTTT	2.36	1.14	5.87	8.33	0.5096
36	Chr1	207513909	207513917	CD55	ATTTTCCTA	6.19	2.49	18.49	3.91	1.7867
37	Chr1	207513929	207513937	CD55	CTGGTTTCA	1.66	0.8	3.44	6.53	-0.6091
38	Chr1	207513953	207513961	CD55	GCGATTTTT	30.7	8.57	1177	8.32	0.8305
39	Chr1	207513977	207513985	CD55	GTTGCGATT	3.17	1.53	7.88	3.67	0.117
40	Chr1	207514015	207514023	CD55	CATTTTCTT	1.64	0.79	3.41	5.34	-0.0501
41	Chr1	207514028	207514036	CD55	CATTTGTAC	7.6	3.05	22.68	4.11	0.1307
42	Chr1	207514128	207514136	CD55	GTTTTATTT	10.59	4.26	45.55	5.46	0.4511
43	Chr1	207514177	207514185	CD55	AAGATAGTT	3.56	1.72	8.85	2.45	-0.6734
44	Chr1	207514187	207514195	CD55	TATTTTTTT	1.25	0.6	2.6	7.39	0.4425
45	Chr1	207514197	207514205	CD55	TGTTTTCAG	2.6	1.25	5.39	2.39	0.9736
46	Chr1	207514214	207514222	CD55	ATATTGTTT	2.15	1.03	4.45	3.26	0.0044
47	Chr1	207514241	207514249	CD55	ATTTACATT	11.7	4.7	50.31	5.97	1.123
48	Chr1	207514258	207514266	CD55	CAGTATATA	2.56	1.24	5.32	1.05	2.0984
49	Chr1	207514269	207514277	CD55	ATTTCCCTT	2.64	1.28	5.48	7.06	-0.0845
50	Chr1	207514301	207514309	CD55	TGTTATTTT	3.23	1.56	8.03	6.78	0.5815
51	Chr1	207514401	207514409	CD55	GTTTTTCAT	1.47	0.71	3.04	2.51	-0.0855
52	Chr1	207514432	207514440	CD55	TCATGTCTT	7.03	3.39	20.99	5.83	-0.2396
53	Chr1	207514444	207514452	CD55	CCCACTTTT	8.02	3.22	23.95	4.2	0.3793
54	Chr1	207514460	207514468	CD55	ATTATTTGT	2.96	1.43	6.13	7.24	-0.8392
55	Chr1	207514491	207514499	CD55	GTTGTATAT	7.6	3.06	22.71	2.87	0.6563
56	Chr1	207514527	207514535	CD55	ATAGTTTAT	4.22	2.03	10.49	2.62	-0.0453
57	Chr1	207514539	207514547	CD55	TATTTTCTT	0.78	0.37	1.61	4.2	1.1526
58	Chr1	207514549	207514557	CD55	CATTTAGCA	1.81	0.87	3.75	2.04	0.6244
59	Chr1	207514580	207514588	CD55	TTGTTTCCT	1.5	0.72	3.11	2.66	0.5916
60	Chr1	207514603	207514611	CD55	CTTTTTAGT	76.31	12.32	1175.6	33.97	-0.8944
61	Chr1	207514624	207514632	CD55	TATTTATCT	19.54	6.54	361.32	18.15	-2.3752
62	Chr1	207514634	207514642	CD55	TTTTTGTTT	1.49	0.72	3.08	18.66	-2.081
63	Chr1	207514654	207514662	CD55	GCTTTTGAG	2.94	1.42	6.09	2.89	-1.339
64	Chr1	207514716	207514724	CD55	GTTTTCTTC	4.49	2.16	11.17	2.96	0.664
65	Chr1	207514730	207514738	CD55	TTTTTATAG	9.28	3.73	27.71	4.46	0.0768
66	Chr1	207514752	207514760	CD55	GTTTAAGTT	4.16	2.01	10.36	3.14	0.0017
67	Chr1	207514775	207514783	CD55	TTTGATTTT	4.28	2.07	10.66	3.13	1.177
68	Chr1	207514810	207514818	CD55	GTTTCATTC	3.73	1.8	9.27	5.97	-0.6113
69	Chr1	207514824	207514832	CD55	TATTTTCCC	1.77	0.86	3.68	1.74	1.1683
70	Chr1	207514838	207514846	CD55	TATTTATTG	7.12	2.86	21.27	3.16	0.9835
71	Chr1	207514931	207514939	CD55	GTTCTCTAT	9.49	3.82	34.02	4.89	-0.266
72	Chr1	207514943	207514951	CD55	GTTCCATTA	6.34	3.06	15.79	3.92	-0.9283
73	Chr1	207514963	207514971	CD55	TGTTTTTAT	0.77	0.37	1.6	3.22	-0.1184
74	Chr1	207515004	207515012	CD55	CTTATATTT	2.1	1.01	4.35	2.66	-2.4302
75	Chr1	207515040	207515048	CD55	CTTTGTTTT	1.59	0.76	3.29	3.77	-1.0746
76	Chr1	207515061	207515069	CD55	GTTAGCTCT	1.27	0.61	2.63	1.5	0.3662
77	Chr1	207515076	207515084	CD55	TCTTTTGGT	0.8	0.39	1.66	2.04	-1.0188
78	Chr1	207515090	207515098	CD55	AATCATTTT	1.18	0.57	2.44	2.36	-0.169
79	Chr1	207515101	207515109	CD55	GACTTTTTT	0.3	0.1	0.74	6.28	-0.9342
80	Chr1	207515111	207515119	CD55	TTTCTATTT	1.22	0.59	2.53	2.72	-0.1082
81	Chr1	207531793	207531801	CD55	TTCGTTTTT	1.89	0.91	3.91	2.78	-0.1752
82	Chr1	207531837	207531845	CD55	GTTTTTTTC	1.09	0.53	2.26	13.61	0.5172
83	Chr1	207531847	207531855	CD55	TCTCTACTA	2.24	1.08	5.57	2.44	1.0445
84	Chr1	207531985	207531993	CD55	AATTACATT	6.79	2.73	20.28	4.71	0.087
85	Chr1	207532011	207532019	CD55	ATCCATTAA	203.85	19.05	1051.8	38	0.4038
86	Chr1	207532089	207532097	CD55	TGTTTTTTT	7.79	3.13	23.28	11.59	0.3533
87	Chr1	207532117	207532125	CD55	CATTGAATC	1000	77.89	1200	94.37	4.4447
88	Chr1	207532187	207532195	CD55	CCTACATTT	12.37	4.97	53.17	6.75	-0.4395
89	Chr1	207532236	207532244	CD55	CAAATATTC	1.6	0.77	3.32	1.42	-0.0771
90	Chr1	207532270	207532278	CD55	ACTTTTAAA	1.25	0.6	2.59	6.46	-2.7853
91	Chr1	207532297	207532305	CD55	ATAATTTGC	0.97	0.47	2.02	6.47	-2.5289
92	Chr1	207532327	207532335	CD55	CTTGTATTT	24.29	8.13	1117.5	7.58	1.7888
93	Chr1	207532401	207532409	CD55	ATCCTTTTA	9.33	3.75	33.42	1.5	2.7027
94	Chr1	207532417	207532425	CD55	TGTTTATAG	2.5	1.21	5.18	3.47	-0.5424
95	Chr1	207532442	207532450	CD55	CATATCTTT	60.58	11.74	1120	28.52	-2.4535
96	Chr1	207532519	207532527	CD55	TCTTAATCT	1.32	0.64	2.73	2.41	0.0016
97	Chr1	207532551	207532559	CD55	CAGGGGTTT	1.88	0.91	3.91	2.91	-1.3285
98	Chr1	207532561	207532569	CD55	TATTTATTT	0.38	0.13	0.79	5	-0.7176
99	Chr1	207532573	207532581	CD55	TATTTTTTT	0.46	0.18	0.95	3.8	0.4828
100	Chr1	207532606	207532614	CD55	ATTGACTTT	2.92	1.41	6.05	3.11	0.5489
101	Chr1	207532630	207532638	CD55	TTAATTCAT	7.26	2.92	21.67	3.17	1.1166
102	Chr1	207532686	207532694	CD55	CATTTTAGT	3.06	1.48	6.35	3.56	-0.1203
103	Chr1	207532736	207532744	CD55	ATATTCTAT	1.92	0.93	3.99	8.33	-2.3287
104	Chr1	207532750	207532758	CD55	ATTATTTTT	0.73	0.35	1.52	10.52	-1.3709
105	Chr1	207532760	207532768	CD55	TTGTTTTGC	1.59	0.77	3.3	2.87	0.927
106	Chr1	207532784	207532792	CD55	ATTCTTTTT	9.41	3.78	33.71	5.9	1.1412
107	Chr1	207532819	207532827	CD55	ATTTATATT	1.46	0.71	3.03	5.54	-0.1378
108	Chr1	207532847	207532855	CD55	CATTTTGAT	2.56	1.24	6.38	6.71	-4.1589
109	Chr1	207532862	207532870	CD55	TTTTTTTTT	0.17	0.1	0.42	4.29	0.5244
110	Chr1	207532872	207532880	CD55	TTTTTTTTT	0.2	0.1	0.49	4.94	3.0799
111	Chr1	207267922	207267930	C4BPB	CTTTTTATG	0.67	0.27	1.39	2.02	-0.9576
112	Chr1	207267934	207267942	C4BPB	CTTCATTAT	3.75	1.81	9.32	12.25	-4.5131
113	Chr1	207267983	207267991	C4BPB	GATTCTTTC	5.1	2.46	12.69	4.16	-2.3693
114	Chr1	207268002	207268010	C4BPB	GTTTACCAC	0.85	0.41	1.77	1.36	-1.3541
115	Chr1	207268013	207268021	C4BPB	CATCTCCTT	1.67	0.8	3.46	2.35	-2.9664
116	Chr1	207268024	207268032	C4BPB	GTTCAAAAT	12.57	5.05	54.03	5.33	-3.4804
117	Chr1	207268096	207268104	C4BPB	CTTCTTGCT	3.26	1.57	8.12	3.68	-2.3262
118	Chr1	207268107	207268115	C4BPB	CCTCTATTC	19.22	6.44	205.66	7.81	-2.6636
119	Chr1	207268262	207268270	C4BPB	TATTTTGGC	1.15	0.55	2.38	1.24	-0.8478
120	Chr1	207268272	207268280	C4BPB	TATAACTTT	5.73	2.76	14.25	3.08	-1.7387
121	Chr1	207268283	207268291	C4BPB	ATACTTTTT	3.48	1.68	8.67	2.49	0.5298
122	Chr1	207268315	207268323	C4BPB	CATGATTTA	1000	54.09	1200	212.43	-2.2222
123	Chr1	207268361	207268369	C4BPB	GTTTTTACT	35.03	9.78	1119.3	9.85	-0.3053
124	Chr1	207268374	207268382	C4BPB	CATTTGTTT	1000	26.09	1200	443.45	-2.4849
125	Chr1	207268421	207268429	C4BPB	ATCATTGTT	9.2	3.7	32.96	2.21	-1.4709
126	Chr1	207268433	207268441	C4BPB	CACTATTTT	2.21	1.07	4.59	4.3	-2.1922
127	Chr1	207268449	207268457	C4BPB	CATGTTTAG	15.95	6.41	98.78	7.94	-2.7047
128	Chr1	207268497	207268505	C4BPB	ATATTATTT	3.3	1.59	6.84	1.17	0.8037
129	Chr1	207268603	207268611	C4BPB	CTCCTAACA	1.92	0.93	3.99	0.66	1.505
130	Chr1	207268621	207268629	C4BPB	GCTTTCTTT	1.18	0.57	2.45	1.19	3.6601
131	Chr1	207268666	207268674	C4BPB	CATGTTCTC	0.24	0.1	0.6	1.54	-0.3901
132	Chr1	207268679	207268687	C4BPB	ATTTCTTTT	0.1	0.08	0.17	7.14	-1.2196
133	Chr1	207268702	207268710	C4BPB	GTCTTGCTC	0.9	0.36	1.86	1.02	-1.3663
134	Chr1	207268979	207268987	C4BPB	CCTTTTTCT	1.02	0.49	2.12	1.87	0.8596
135	Chr1	207268992	207269000	C4BPB	CTCTCTTTG	8.15	3.27	24.33	2.06	1.7156
136	Chr1	207269101	207269109	C4BPB	GATTTCTCA	1.25	0.6	2.59	5.99	-1.3273
137	Chr1	207269177	207269185	C4BPB	GTTGTTTAA	1.48	0.71	3.07	1.65	0.0801
138	Chr1	207269206	207269214	C4BPB	CTCTCTCGT	2.08	1.01	4.32	0.67	2.7346
139	Chr1	207269224	207269232	C4BPB	TGTTATGTG	0.58	0.23	1.21	0.71	2.2632
140	Chr1	207269249	207269257	C4BPB	CTTTGCCTT	0.89	0.43	1.85	0.36	4.207
141	Chr1	207269260	207269268	C4BPB	GCCATGATT	4.19	2.02	10.44	0.61	2.531
142	Chr1	207269270	207269278	C4BPB	TAAGTTTTC	0.24	0.1	0.6	1.64	3.0129
143	Chr1	207269358	207269366	C4BPB	CTTTTCTTT	0.34	0.11	0.84	5.68	0.0713
144	Chr1	207269387	207269395	C4BPB	TATTTCTGT	1.35	0.65	2.81	1.34	0.4792
145	Chr1	207269423	207269431	C4BPB	TCATGTTTC	2.35	1.13	4.86	0.96	2.8261
146	Chr1	207269435	207269443	C4BPB	ACTCTTATC	0.83	0.4	1.73	1.83	3.2685
147	Chr1	207269459	207269467	C4BPB	CTTCCACTT	2.87	1.38	5.95	1.78	-0.0755
148	Chr1	207269501	207269509	C4BPB	TTATTTCTT	0.58	0.23	1.2	1.64	0.1788
149	Chr1	207269514	207269522	C4BPB	CTTCACCTA	1.15	0.55	2.38	1.29	0.4304
150	Chr1	207269531	207269539	C4BPB	TTTTTCTTT	0.56	0.23	1.17	6.08	-1.4142
151	Chr1	207269541	207269549	C4BPB	CTTGTACAT	2.7	1.3	5.59	3.08	-1.6521
152	Chr1	207269555	207269563	C4BPB	ATTAGCTTC	5.15	2.49	12.82	6.08	-0.8859
153	Chr1	207269566	207269574	C4BPB	TACAACTTA	1.4	0.67	2.89	2.85	-0.1863
154	Chr1	207269577	207269585	C4BPB	ATTTCTTTC	0.31	0.1	0.63	7.83	0.3426
155	Chr1	207269587	207269595	C4BPB	TTGAGCTCC	0.54	0.22	1.13	0.31	2.6513
156	Chr1	207269704	207269712	C4BPB	CAGGTTTCC	5.5	2.65	13.67	1.26	1.9228
157	Chr1	207269809	207269817	C4BPB	CTGTTCATT	9.98	4.01	35.76	1.35	1.7245
158	Chr1	207269843	207269851	C4BPB	GACTTCTAT	4.69	2.26	11.68	2.65	2.5822
159	Chr1	207269853	207269861	C4BPB	CTCGTTTCT	4.21	2.03	10.49	3.62	2.734
160	Chr1	207270007	207270015	C4BPB	CATTGTTTT	1.93	0.93	4.01	1.63	-0.9487
161	Chr1	207270047	207270055	C4BPB	ATCTGATTT	3.58	1.73	7.43	1.5	0.4138
162	Chr1	207270071	207270079	C4BPB	TTCTAAGCT	2.47	1.19	5.13	1.04	-0.2137
163	Chr1	207270081	207270089	C4BPB	ATTCTGATT	12.07	4.85	43.24	12.13	-1.968
164	Chr1	207270099	207270107	C4BPB	GCTTTGGCC	1.17	0.57	2.43	0.72	1.072
165	Chr1	207270158	207270166	C4BPB	ATCCTACTT	0.38	0.15	0.79	0.58	0.0134
166	Chr1	207270181	207270189	C4BPB	ATCTCTTTT	0.1	0.08	0.25	0.83	1.631
167	Chr11	65266455	65266463	MALAT1	CGAATTCCG	6.2	2.99	15.43	0.87	N.A.
168	Chr11	65266514	65266522	MALAT1	GTAGGCATT	2.29	1.11	4.75	0.66	N.A.
169	Chr11	65266586	65266594	MALAT1	GTTTTTTTC	60.11	11.65	1111.3	5.29	N.A.
170	Chr11	65266631	65266639	MALAT1	AATATAGTC	3.1	1.5	7.72	0.49	N.A.
171	Chr11	65266654	65266662	MALAT1	ATATTGCTT	3.68	1.77	9.15	2.58	N.A.
172	Chr11	65266668	65266676	MALAT1	TAAGTTTTT	3.82	1.84	9.5	3.69	N.A.
173	Chr11	65266682	65266690	MALAT1	AATTTTAAT	12.43	4.99	53.44	1.36	N.A.
174	Chr11	65266695	65266703	MALAT1	TAAGATTTT	953.01	20.72	1143.6	36.63	N.A.
175	Chr11	65266756	65266764	MALAT1	GGTTTCTAA	344.37	18.63	1028.3	35.6	N.A.
176	Chr11	65266807	65266815	MALAT1	AATGTATTT	45.36	10.55	1006.4	6.07	N.A.
177	Chr11	65266897	65266905	MALAT1	GACTTAAAC	4.05	1.95	8.39	1.36	N.A.
178	Chr11	65266913	65266921	MALAT1	AGTTTAGTT	3.74	1.8	9.3	1.01	N.A.
179	Chr11	65266942	65266950	MALAT1	AATAATTTG	5.46	2.63	13.59	1.04	N.A.
180	Chr11	65266956	65266964	MALAT1	GATCTTTTA	24.42	8.18	1123.3	2.68	N.A.
181	Chr11	65266986	65266994	MALAT1	GATTAAAAG	29.66	8.28	1137	2.42	N.A.
182	Chr11	65267204	65267212	MALAT1	CATACTTTT	18.57	6.22	165.6	3.3	N.A.
183	Chr11	65267224	65267232	MALAT1	GATAAATTT	9.34	3.75	27.88	1.33	N.A.
184	Chr11	65267482	65267490	MALAT1	AATTTATTT	12.08	4.85	43.28	5.44	N.A.
185	Chr11	65267504	65267512	MALAT1	ATTTAATTT	28.95	9.69	1109.8	3.98	N.A.
186	Chr11	65267557	65267565	MALAT1	TGTTTACGT	9.39	3.77	33.65	0.85	N.A.
187	Chr11	65267573	65267581	MALAT1	AACCAATTT	22.73	7.61	871.28	1.84	N.A.
188	Chr11	65267586	65267594	MALAT1	GAATACTTG	12.58	5.06	54.09	0.94	N.A.
189	Chr11	65267650	65267658	MALAT1	GTGTAATTT	10.88	4.37	38.98	1.16	N.A.
190	Chr11	65267678	65267686	MALAT1	GGCTTTTGG	57.94	11.23	1071.2	1.29	N.A.
191	Chr11	65267724	65267732	MALAT1	GCTTAGTTT	724.68	22.68	1043.5	60.38	N.A.
192	Chr11	65267796	65267804	MALAT1	GTTTTTGCA	7.71	3.1	23.02	2	N.A.
193	Chr11	65267810	65267818	MALAT1	CTTTGAGTT	20.48	6.86	262.94	1.86	N.A.
194	Chr11	65267822	65267830	MALAT1	ATTATTTTT	7.68	3.09	22.93	9.15	N.A.
195	Chr11	65267848	65267856	MALAT1	CATTAATTG	8.89	3.57	31.85	0.9	N.A.
196	Chr11	65268105	65268113	MALAT1	GCAATTTGG	17.27	5.78	154.01	1.18	N.A.
197	Chr11	65268261	65268269	MALAT1	GTTGTTTTT	12.66	5.09	45.37	1.53	N.A.
198	Chr11	65268295	65268303	MALAT1	TATTTATTT	5.71	2.29	14.21	2.19	N.A.
199	Chr11	65268321	65268329	MALAT1	GTTTCGTAC	4.84	1.95	12.05	0.23	N.A.
200	Chr11	65268344	65268352	MALAT1	ATTTATATG	1.73	0.84	3.59	0.43	N.A.
201	Chr11	65268362	65268370	MALAT1	GCCGATTTC	2.11	1.02	4.38	0.32	N.A.
202	Chr11	65268373	65268381	MALAT1	GGTGTTGTA	3.62	1.74	9	0.31	N.A.
203	Chr11	65268383	65268391	MALAT1	GTTTCTCTT	12.76	5.13	54.88	1.87	N.A.
204	Chr11	65268399	65268407	MALAT1	CTTATACTC	3.23	1.56	8.04	0.59	N.A.
205	Chr11	65268422	65268430	MALAT1	AAGCTTTTG	6.08	2.44	18.16	0.46	N.A.
206	Chr11	65268470	65268478	MALAT1	AGTTTGTGG	0.5	0.2	1.04	0.3	N.A.
207	Chr11	65268480	65268488	MALAT1	TTTTTTTTT	0.25	0.08	0.63	2.78	N.A.
208	Chr11	65268490	65268498	MALAT1	TTACACGAA	0.65	0.26	1.35	0.28	N.A.
209	Chr11	65268563	65268571	MALAT1	TTGTATGTT	13.99	5.62	60.16	2.41	N.A.
210	Chr11	65268590	65268598	MALAT1	ATTTCAGTT	5.16	2.07	12.83	1.15	N.A.
211	Chr11	65268616	65268624	MALAT1	GTTTTTACT	4.26	2.05	10.6	0.84	N.A.
212	Chr11	65268637	65268645	MALAT1	ATTCGTTTT	5.48	2.2	13.64	0.81	N.A.
213	Chr11	65268684	65268692	MALAT1	GAGTTTTCA	0.52	0.21	1.07	0.25	N.A.
214	Chr11	65268694	65268702	MALAT1	TATTTTTTT	0.2	0.1	0.5	1.82	N.A.
215	Chr11	65268713	65268721	MALAT1	GGGGGCAAA	1.58	0.63	3.93	0.19	N.A.
216	Chr11	65268723	65268731	MALAT1	TATGTTTTC	5.76	2.78	14.34	2.43	N.A.
217	Chr11	65268733	65268741	MALAT1	GTTCTTTTT	3.03	1.46	6.28	4.84	N.A.
218	Chr11	65268743	65268751	MALAT1	CCTTAGGTC	4.28	1.72	12.79	0.18	N.A.
219	Chr11	65268755	65268763	MALAT1	CTAGAATCC	3.7	1.79	9.22	0.32	N.A.
220	Chr11	65268835	65268843	MALAT1	TTTACAGTT	4.47	2.16	11.13	0.86	N.A.
221	Chr11	65268861	65268869	MALAT1	TTCTCACGT	2.54	1.22	5.26	0.67	N.A.
222	Chr11	65268913	65268921	MALAT1	TTACTCTTT	2.15	1.04	4.47	0.49	N.A.
223	Chr11	65268941	65268949	MALAT1	TCAGACTTT	4.72	1.9	11.74	0.91	N.A.
224	Chr11	65268964	65268972	MALAT1	CCTTAAACT	9.71	3.9	34.78	1.57	N.A.
225	Chr11	65268974	65268982	MALAT1	GTTATTTTT	1.17	0.56	2.43	3.63	N.A.
226	Chr11	65268992	65269000	MALAT1	CATTTTGGG	1.9	0.92	3.94	0.31	N.A.
227	Chr11	65269003	65269011	MALAT1	GGTCTTAAC	1.4	0.68	2.9	0.32	N.A.
228	Chr11	65269039	65269047	MALAT1	TGTTTTTTT	0.99	0.48	2.05	3.41	N.A.
229	Chr11	65269049	65269057	MALAT1	TAAGATTTT	3.36	1.62	8.35	0.25	N.A.
230	Chr11	65269150	65269158	MALAT1	TTTTATCCT	48.53	11.29	1076.7	3.69	N.A.
231	Chr11	65269211	65269219	MALAT1	TTCATATTC	16.56	5.55	123.05	2.06	N.A.
232	Chr11	65269221	65269229	MALAT1	GTCATCTCA	8.2	3.3	24.49	0.98	N.A.
233	Chr11	65269233	65269241	MALAT1	GAACTTCAG	10.14	4.07	36.33	1.04	N.A.
234	Chr11	65269245	65269253	MALAT1	AGCTTGAGT	5.75	2.77	14.31	0.45	N.A.
235	Chr11	65269258	65269266	MALAT1	CAAATGTTG	8.47	3.4	25.29	1.38	N.A.
236	Chr11	65269269	65269277	MALAT1	GTTAAGTTT	2.46	1.19	5.1	2.42	N.A.
237	Chr11	65269289	65269297	MALAT1	GACTTCTTA	7.67	3.08	22.89	1.37	N.A.
238	Chr11	65269300	65269308	MALAT1	AGTTTTATT	1.01	0.49	2.1	3.18	N.A.
239	Chr11	65269350	65269358	MALAT1	TGTTACGGT	1.09	0.53	2.26	0.75	N.A.
240	Chr11	65269361	65269369	MALAT1	GGATTGGTG	1.81	0.87	3.75	0.68	N.A.
241	Chr11	65269375	65269383	MALAT1	GGTTTAGGT	7.68	3.09	27.52	0.81	N.A.
242	Chr11	65269387	65269395	MALAT1	TGTTTAGTT	3.39	1.63	7.02	2.75	N.A.
243	Chr11	65269475	65269483	MALAT1	GCAAGTAAC	6.14	2.96	15.27	1.24	N.A.
244	Chr11	65269493	65269501	MALAT1	TTTAGTTTT	11.25	4.52	40.33	50.37	N.A.
245	Chr11	65269512	65269520	MALAT1	GTTTGAATT	2.91	1.4	6.03	1.5	N.A.
246	Chr11	65269566	65269574	MALAT1	CATTAATTT	36.34	10.14	1161.1	6.52	N.A.
247	Chr11	65269605	65269613	MALAT1	TATCTGTTT	11.68	4.69	50.23	1.89	N.A.
248	Chr11	65269734	65269742	MALAT1	GTGGTTCTC	11.75	4.72	42.09	1.06	N.A.
249	Chr11	65269744	65269752	MALAT1	TTTGGAATT	5.97	2.88	14.87	2.35	N.A.
250	Chr11	65269754	65269762	MALAT1	TTTTCAGGT	72.93	14.13	1123.6	4.82	N.A.
251	Chr11	65269770	65269778	MALAT1	TAATAATTT	5.07	2.45	12.62	0.74	N.A.
252	Chr11	65269815	65269823	MALAT1	CTTAATGAT	1.56	0.75	3.24	1.14	N.A.
253	Chr11	65269849	65269857	MALAT1	GCTTTTGTA	0.9	0.43	1.86	1.03	N.A.
254	Chr11	65269871	65269879	MALAT1	TTCTATTTT	133.39	14.96	1189.3	11.29	N.A.
255	Chr11	65269896	65269904	MALAT1	AGTTTTTTT	2.23	1.07	5.55	2.72	N.A.
256	Chr11	65269922	65269930	MALAT1	CTTTTCCAT	1000	54.09	1200	54.78	N.A.
257	Chr11	65269972	65269980	MALAT1	TTTTGTAAA	80.15	15.53	1029	16.6	N.A.
258	Chr11	65269982	65269990	MALAT1	TGTTTATTT	39.21	10.94	1043.9	6.93	N.A.
259	Chr11	65270089	65270097	MALAT1	ACTTTTTTT	1.14	0.55	2.36	2.56	N.A.
260	Chr11	65270107	65270115	MALAT1	GACTTTTTT	2.05	0.99	4.26	1.2	N.A.
261	Chr11	65270213	65270221	MALAT1	GATTATATG	5.65	2.72	14.05	0.83	N.A.
262	Chr11	65270257	65270265	MALAT1	ATTCTTACT	5.52	2.66	13.74	0.77	N.A.
263	Chr11	65270346	65270354	MALAT1	TTTTAAAGT	1000	26.09	1200	164.05	N.A.
264	Chr11	65270571	65270579	MALAT1	TGTTTCGTT	34.79	9.71	1111.3	7.69	N.A.
265	Chr11	65270599	65270607	MALAT1	TTCGTTATC	2.72	1.31	5.65	1.08	N.A.
266	Chr11	65270620	65270628	MALAT1	TCATTTCAT	4.66	2.25	11.59	1.42	N.A.
267	Chr11	65270708	65270716	MALAT1	CTTATTTTT	9.11	3.66	32.63	2.02	N.A.
268	Chr11	65270731	65270739	MALAT1	TCTTAAATA	1.35	0.65	2.8	0.34	N.A.
269	Chr11	65270810	65270818	MALAT1	TTTTTAAAA	3.23	1.56	8.05	3.58	N.A.
270	Chr11	65270877	65270885	MALAT1	TTTGCATCT	1000	45.08	1200	293.56	N.A.
271	Chr11	65270890	65270898	MALAT1	ATAATTTCT	3.96	1.91	8.21	2.15	N.A.
272	Chr11	65270942	65270950	MALAT1	AATTTGTTT	4.02	1.94	10	0.87	N.A.
273	Chr11	65271025	65271033	MALAT1	TTACATGTT	39.88	11.13	1061.8	5.25	N.A.
274	Chr11	65271057	65271065	MALAT1	CATTAAATC	125.2	16.85	1116.3	27.16	N.A.
275	Chr11	65271082	65271090	MALAT1	TATTTTTAT	21.62	7.24	479.6	7.99	N.A.
276	Chr11	65271100	65271108	MALAT1	TATACTTTT	11.04	4.44	39.55	2.06	N.A.
277	Chr11	65271152	65271160	MALAT1	GTTCAGTGT	3.62	1.75	9.02	0.49	N.A.
278	Chr11	65271180	65271188	MALAT1	ATTCTTCTC	3.46	1.67	7.17	1.35	N.A.
279	Chr11	65271200	65271208	MALAT1	AAACTTTGT	4.59	2.22	11.43	0.48	N.A.
280	Chr11	65271217	65271225	MALAT1	ACTCTTTAA	2.44	1.18	5.06	0.66	N.A.
281	Chr11	65271284	65271292	MALAT1	ATTTTATTC	2.31	1.11	4.78	1.91	N.A.
282	Chr11	65271402	65271410	MALAT1	GGTAATTAC	0.55	0.22	1.14	0.42	N.A.
283	Chr11	65271413	65271421	MALAT1	ATTTTATTT	9.09	3.65	32.56	1.87	N.A.
284	Chr11	65271467	65271475	MALAT1	TTTTTCACA	35.65	9.95	1139	5.18	N.A.
285	Chr11	65271491	65271499	MALAT1	TGTTAACTT	14.4	5.79	74.28	3.54	N.A.
286	Chr11	65271534	65271542	MALAT1	TTTACACTA	11.01	4.43	47.35	0.81	N.A.
287	Chr11	65271548	65271556	MALAT1	CTTATATAG	3.98	1.92	9.91	0.44	N.A.
288	Chr11	65271578	65271586	MALAT1	GGGTTTTAA	2.29	1.1	4.75	1.39	N.A.
289	Chr11	65271589	65271597	MALAT1	AATTTTCCT	2.93	1.41	6.07	1.59	N.A.
290	Chr11	65271606	65271614	MALAT1	GCATTTCAT	16.07	5.38	143.3	0.61	N.A.
291	Chr11	65271648	65271656	MALAT1	TATGAGTGC	3.46	1.67	7.16	1.34	N.A.
292	Chr11	65271658	65271666	MALAT1	TGGCTCTTC	8.66	3.48	31.04	0.22	N.A.
293	Chr11	65271668	65271676	MALAT1	TTCTGTTCT	4.03	1.94	10.03	2.83	N.A.
294	Chr11	65271721	65271729	MALAT1	AATTTTTTT	0.58	0.28	1.2	0.87	N.A.
295	Chr11	65271762	65271770	MALAT1	GGGCTTACT	0.35	0.12	0.88	1.22	N.A.
296	Chr11	65271779	65271787	MALAT1	CTTTTTTTT	0.1	0.08	0.21	3.96	N.A.
297	Chr11	65271789	65271797	MALAT1	TTTTACAGA	0.1	0.08	0.3	0.79	N.A.
298	Chr11	65271799	65271807	MALAT1	TTCACAGAG	0.37	0.15	0.76	0.3	N.A.
299	Chr11	65271814	65271822	MALAT1	GTTGTCTTG	1.14	0.55	2.37	1.21	N.A.
300	Chr11	65271860	65271868	MALAT1	GTACTGTTC	12.78	5.14	54.96	0.57	N.A.
301	Chr11	65271880	65271888	MALAT1	CTATTAGAA	6.44	3.11	16.02	0.71	N.A.
302	Chr11	65271914	65271922	MALAT1	ATTAAAAGT	8.06	3.89	24.07	0.91	N.A.
303	Chr11	65272008	65272016	MALAT1	AGTTTTAAG	3.36	1.62	6.96	0.63	N.A.
304	Chr11	65272023	65272031	MALAT1	TATTTGTGA	3.83	1.85	7.94	1.24	N.A.
305	Chr11	65272042	65272050	MALAT1	GTACATTTT	2.51	1.21	5.21	0.94	N.A.
306	Chr11	65272056	65272064	MALAT1	TGTATTTTT	7.7	3.71	22.99	2.56	N.A.
307	Chr11	65272076	65272084	MALAT1	TTTTTGTTC	27.77	7.75	1064.7	6.72	N.A.
308	Chr11	65272086	65272094	MALAT1	TTTCTGGTG	12.15	4.88	43.53	1.26	N.A.
309	Chr11	65272113	65272121	MALAT1	CTTTAGTCT	8.47	4.09	25.3	1.77	N.A.
310	Chr11	65272172	65272180	MALAT1	ACAGTCTTC	413.52	18.64	1029	34.51	N.A.
311	Chr11	65272224	65272232	MALAT1	ATCTTTAGT	7.64	3.07	22.8	1.24	N.A.
312	Chr11	65272235	65272243	MALAT1	ATTGTTTAT	6.09	2.94	15.15	2.15	N.A.
313	Chr11	65272249	65272257	MALAT1	GGTTTCTCT	2.09	1.01	4.33	0.6	N.A.
314	Chr11	65272263	65272271	MALAT1	CTCCCTTGG	3.48	1.68	7.22	0.2	N.A.
315	Chr11	65272273	65272281	MALAT1	CTTAATTCT	3.15	1.52	6.53	1.35	N.A.
316	Chr11	65272356	65272364	MALAT1	TATTTACTT	16.16	5.41	120.04	4.29	N.A.
317	Chr11	65272379	65272387	MALAT1	ATTCCATTT	6.93	3.34	17.25	4.75	N.A.
318	Chr11	65272397	65272405	MALAT1	GGATTGGGA	19.27	6.45	171.82	1.1	N.A.
319	Chr11	65272408	65272416	MALAT1	CACTAGTTC	15.78	5.29	117.28	1.52	N.A.
320	Chr11	65272425	65272433	MALAT1	GGTATTCTT	3.42	1.65	8.5	0.85	N.A.
321	Chr11	65272450	65272458	MALAT1	CTTCCAGTT	1000	64.91	1200	76.61	N.A.
322	Chr11	65272637	65272645	MALAT1	CCTTTTTTT	0.71	0.28	1.46	1.74	N.A.
323	Chr11	65272648	65272656	MALAT1	GATTTTTCA	0.46	0.18	0.94	1.33	N.A.
324	Chr11	65272738	65272746	MALAT1	TATTATCCT	6.61	3.19	16.44	0.91	N.A.
325	Chr11	65272757	65272765	MALAT1	GAAGTGTCA	3.14	1.52	7.82	0.41	N.A.
326	Chr11	65272776	65272784	MALAT1	ATTTTTATT	7.3	2.93	21.79	4.84	N.A.
327	Chr11	65272788	65272796	MALAT1	AATGAGGAC	2.99	1.44	6.21	2.65	N.A.
328	Chr11	65272809	65272817	MALAT1	CCTCTTTCT	1.77	0.85	3.67	5.21	N.A.
329	Chr11	65272861	65272869	MALAT1	CTCTTAACA	4.37	2.11	10.87	3.81	N.A.
330	Chr11	65272881	65272889	MALAT1	TGTTTTTAT	85.46	13.8	1097.3	16.4	N.A.
331	Chr11	65273045	65273053	MALAT1	CTTTTGATC	2.52	1.21	5.22	0.43	N.A.
332	Chr11	65273151	65273159	MALAT1	GTCTTTGGT	4.33	2.09	10.77	1.89	N.A.
333	Chr11	65273198	65273206	MALAT1	CAAATTGTT	18.63	6.24	166.13	1.22	N.A.
334	Chr11	65273358	65273366	MALAT1	GCATTTGAG	4.85	2.34	10.06	0.69	N.A.
335	Chr11	65273407	65273415	MALAT1	GCTAAGACT	4.91	2.37	12.22	0.32	N.A.
336	Chr2	85768330	85768338	MAT2A	ATTATTTTT	3.42	1.65	8.51	4.24	-2.0129
337	Chr2	85768350	85768358	MAT2A	GTTTGAGTT	24.45	8.19	781.05	1.72	1.1511
338	Chr2	85768366	85768374	MAT2A	TCTTTTTAT	10.34	4.15	37.04	3.05	0.8618
339	Chr2	85768509	85768517	MAT2A	TAATGATTT	27.77	7.75	1064.6	2.31	0.4262
340	Chr2	85768520	85768528	MAT2A	CTCATTTTT	2.56	1.23	6.37	3.2	0.9493
341	Chr2	85768597	85768605	MAT2A	TATCTTACT	3.31	1.59	6.85	1.65	-1.71
342	Chr2	85768615	85768623	MAT2A	GCCCTATTC	5.39	2.6	13.4	0.93	1.6414
343	Chr2	85768625	85768633	MAT2A	GTTCATTCT	8.27	3.99	24.69	3.37	-0.0323
344	Chr2	85768659	85768667	MAT2A	ATTTGATTT	8.27	3.32	24.69	3.69	-1.58
345	Chr2	85768739	85768747	MAT2A	GTGTTTTTT	3.44	1.66	7.13	3.55	0.3054
346	Chr2	85768888	85768896	MAT2A	GTTTTAATC	1.47	0.71	3.04	2.74	-1.5176
347	Chr2	85768923	85768931	MAT2A	GATCACATT	4.95	2.39	10.26	1.51	-0.1964
348	Chr2	85768937	85768945	MAT2A	CTTTTCTTT	2.37	1.14	4.91	2.83	1.714
349	Chr2	85769125	85769133	MAT2A	TCATTTATT	3.59	1.73	8.93	2.4	-0.2555
350	Chr2	85769151	85769159	MAT2A	CCATAATTT	47.46	11.04	1053.1	4.55	-1.3143
351	Chr2	85769186	85769194	MAT2A	CATTTGTTT	1000	31.3	1200	112.28	0.497
352	Chr2	85769201	85769209	MAT2A	ATTGTAACT	18.61	6.23	165.89	2.54	-1.255
353	Chr2	85769233	85769241	MAT2A	GTTATTGTT	21	7.03	187.19	6.48	-2.1283
354	Chr2	85769265	85769273	MAT2A	TGTTGCCTT	6.75	2.71	20.16	0.3	4.4562
355	Chr2	85769504	85769512	MAT2A	CATTTTGTT	4.49	2.17	11.18	4.51	-2.4228
356	Chr2	85769514	85769522	MAT2A	CATTTTTCT	37.21	10.38	1188.7	9.99	-1.5576
357	Chr2	85769545	85769553	MAT2A	ATTTTGGCT	1.44	0.7	2.99	1.1	1.8563
358	Chr2	85769556	85769564	MAT2A	TACATTTTT	0.53	0.21	1.09	3.65	1.0498
359	Chr2	85769569	85769577	MAT2A	GGCTTTCTG	0.7	0.34	1.45	0.38	1.0741
360	Chr8	128750366	128750374	MYC	CGCTTTAGG	3.69	1.78	9.18	0.64	-1.9635
361	Chr8	128750378	128750386	MYC	TAGCTCTGC	10.36	4.16	37.12	0.93	-1.7676
362	Chr8	128750417	128750425	MYC	CTGCGCGCT	3.66	1.77	7.6	0.49	-2.1802
363	Chr8	128750452	128750460	MYC	TTTAACTCA	2.31	1.11	4.79	0.35	1.4197
364	Chr8	128750470	128750478	MYC	CCCGCTTTG	2.33	1.13	4.84	0.33	4.4916
365	Chr8	128751318	128751326	MYC	CATTTTCAT	0.98	0.47	2.03	1.18	0.8803
366	Chr8	128751351	128751359	MYC	CTTATTAGG	2.88	1.39	7.17	0.65	1.6046
367	Chr8	128751396	128751404	MYC	CATCACCTC	1.66	0.8	3.45	0.67	0.0077
368	Chr8	128751418	128751426	MYC	TTTAGCGTT	0.76	0.37	1.57	0.86	0.4809
369	Chr8	128751437	128751445	MYC	CCTTCCCCT	0.64	0.26	1.32	0.56	-1.0428
370	Chr8	128751475	128751483	MYC	CCGTTTGTC	0.6	0.24	1.25	0.41	2.1306
371	Chr8	128751499	128751507	MYC	ATTTCATTT	7.57	3.65	22.6	3.46	-0.9247
372	Chr8	128751509	128751517	MYC	GGTTTTTAA	5.59	2.69	13.9	1.8	-1.1665
373	Chr8	128751526	128751534	MYC	GCTTATCTT	2.1	1.01	4.35	1.29	-0.8617
374	Chr8	128751569	128751577	MYC	CATTTTAAT	0.66	0.32	1.37	3.12	-0.5551
375	Chr8	128751644	128751652	MYC	ATGAATTGC	1.17	0.56	2.42	1.33	0.3074
376	Chr8	128751657	128751665	MYC	CTCTTAACT	2.3	1.11	4.76	0.54	1.0145
377	Chr8	128751824	128751832	MYC	GCAAATCCT	0.18	0.09	0.45	0.59	-1.9838
378	Chr8	128751841	128751849	MYC	TTGGACTTT	0.1	0.08	0.25	3.09	-2.8102
379	Chr8	128751851	128751859	MYC	TTTTTTCTT	0.1	0.08	0.17	8.53	-2.8467
380	Chr8	128751861	128751869	MYC	TATTCCTTC	0.26	0.09	0.65	1.63	-1.999
381	Chr8	128751901	128751909	MYC	AATTTTTTT	0.16	0.09	0.4	3.68	-1.453
382	Chr8	128751911	128751919	MYC	TTTTTATTT	0.13	0.09	0.39	3.03	0.1589
383	Chr8	128751922	128751930	MYC	CATTTCCAG	0.5	0.2	1.04	1.09	0.2447
384	Chr8	128752066	128752074	MYC	CATTAAGTC	4.34	2.09	10.79	3.31	-1.6296
385	Chr8	128752116	128752124	MYC	CACTTTTCT	0.61	0.3	1.27	0.65	0.666
386	Chr8	128752148	128752156	MYC	CTTTCCCTT	4.51	2.17	11.21	1.8	-2.1042
387	Chr8	128752206	128752214	MYC	TTGGTTCTT	0.12	0.08	0.36	2.92	-2.3251
388	Chr8	128752216	128752224	MYC	TTTTTTTTT	0.1	0.08	0.25	5.75	-0.9829
389	Chr8	128752226	128752234	MYC	TTCCTTTTT	0.21	0.08	0.52	4.2	-0.1188
390	Chr8	128752374	128752382	MYC	TTTGTAATT	9	3.62	32.26	2.93	-0.2361
391	Chr8	128752556	128752564	MYC	CCTTGTATT	8.65	4.17	25.84	1.19	2.7365
392	Chr8	128752586	128752594	MYC	TTGATTATT	6.61	3.19	19.74	1.78	0.6609
393	Chr8	128752604	128752612	MYC	CCTTGCTAA	7.29	2.93	21.76	0.45	2.537
394	Chr8	128752615	128752623	MYC	GAGTGATTT	2.31	1.11	5.75	0.54	3.8559
395	Chr8	128752625	128752633	MYC	TATTTCCTT	2.4	1.16	5.98	0.61	5.7541
396	Chr12	56552972	56552980	MYL6	GTTCTCTTT	15.23	5.1	135.75	3.8	-2.5108
397	Chr12	56553142	56553150	MYL6	GGTTGTGTA	4.97	2	14.83	0.14	2.523
398	Chr12	56553152	56553160	MYL6	ATGGATGTT	12.04	4.84	51.78	0.37	1.331
399	Chr12	56553199	56553207	MYL6	CACTTGAGT	9.42	4.54	28.13	0.65	-0.6919
400	Chr12	56553230	56553238	MYL6	CTCTTAAGT	6.26	3.02	15.58	0.66	-0.6563
401	Chr12	56553242	56553250	MYL6	CTTTGGTGT	8.55	4.12	25.53	0.4	0.4043
402	Chr12	56553252	56553260	MYL6	CAGTTTGGT	22.68	7.6	1043.5	0.98	-1.3208
403	Chr12	56553266	56553274	MYL6	TATCTCGTT	44.81	10.42	1193.1	1.39	0.7021
404	Chr12	56553287	56553295	MYL6	TCAAAGTTG	4.22	2.04	10.5	0.32	-0.1193
405	Chr12	56553305	56553313	MYL6	CAGAGCTCT	9.38	3.77	28	0.49	-1.0887
406	Chr12	56553322	56553330	MYL6	GTTTGGATT	2.89	1.39	5.99	0.88	-1.3481
407	Chr12	56553341	56553349	MYL6	TCCTGTGTT	18.08	7.27	111.93	0.86	-0.0127
408	Chr12	56553352	56553360	MYL6	CATTCATCT	32.94	9.19	1052.2	1.31	2.7881
409	Chr12	56553559	56553567	MYL6	CAGTTCTTC	7.6	3.66	22.68	0.65	0.8361
410	Chr12	56553577	56553585	MYL6	CTTCCCTTT	2.42	1.17	5.02	0.57	2.2472
411	Chr12	56553616	56553624	MYL6	TGGATTAGC	8.05	3.88	24.05	0.68	-1.0868
412	Chr12	56553630	56553638	MYL6	CCATGGATT	5.91	2.85	14.71	0.73	-1.2382
413	Chr12	56553641	56553649	MYL6	CTTGCTTTT	3.02	1.45	6.25	0.81	-1.087
414	Chr12	56553713	56553721	MYL6	CTTGTGTTA	22.44	7.51	345.66	2.52	-0.8075
415	Chr12	56553745	56553753	MYL6	CTCCTTTAT	3.24	1.56	6.71	1.51	1.1362
416	Chr12	56553938	56553946	MYL6	GTTCTGTGT	5.6	2.7	13.94	0.44	-2.2967
417	Chr12	56553994	56554002	MYL6	CCAATTCCA	3.62	1.75	9.01	0.48	-0.7232
418	Chr12	56554008	56554016	MYL6	GCTTTCTTT	0.56	0.23	1.17	0.57	3.0199
419	Chr12	56554158	56554166	MYL6	GTATAGTGT	3.52	1.7	7.3	0.68	-1.7793
420	Chr12	56554172	56554180	MYL6	GCTTTCCCT	2.59	1.25	5.38	1.18	-3.1046
421	Chr12	56554290	56554298	MYL6	GTATTGTAG	3.98	1.92	8.26	0.82	-2.0729
422	Chr12	56554329	56554337	MYL6	GGAATGTCT	5.42	2.61	13.48	0.44	-0.0829
423	Chr12	56554366	56554374	MYL6	GTCTTTGTC	7.6	3.66	18.91	1.32	-0.4498
424	Chr12	56554384	56554392	MYL6	CCATGAATG	2.84	1.37	5.9	0.18	3.0934
425	Chr12	56554394	56554402	MYL6	CTCTTCCTT	2.97	1.43	6.16	0.25	4.3961
426	Chr12	56554476	56554484	MYL6	CCTCTAGTT	1.78	0.86	3.7	0.5	0.3693
427	Chr12	56554497	56554505	MYL6	GTTTCTTTT	0.33	0.11	0.69	3.3	-0.507
428	Chr12	56554517	56554525	MYL6	GTGCTCTTT	1.21	0.58	2.5	0.73	0.5648
429	Chr12	56554549	56554557	MYL6	CATCTGACT	11.12	4.47	39.85	1.54	-0.7535
430	Chr12	56554569	56554577	MYL6	TGTTTCTGC	2.83	1.36	5.87	1.35	-0.1164
431	Chr12	56554592	56554600	MYL6	GGAGGGGAG	2.01	0.97	5.01	0.03	4.6667
432	Chr12	56554647	56554655	MYL6	CCTCTAGAA	3.91	1.88	9.73	1.2	-2.6037
433	Chr12	56554667	56554675	MYL6	GTTTTACTT	3.03	1.46	6.29	6.04	-3.7926
434	Chr12	56554741	56554749	MYL6	GACCTTCTG	2.05	0.99	4.26	0.96	-2.0472
435	Chr12	56554823	56554831	MYL6	CCTTTCCCC	1.27	0.61	2.64	0.84	-0.9435
436	Chr12	56554871	56554879	MYL6	CTCTGTCCT	0.7	0.34	1.44	0.54	-1.3974
437	Chr12	56554895	56554903	MYL6	GCTGACAGT	1.44	0.69	2.98	0.44	-1.4219
438	Chr12	56554923	56554931	MYL6	AACTTTTCT	1.75	0.84	3.63	2.88	-2.4237
439	Chr12	56554940	56554948	MYL6	TGTGTTCTT	2.17	1.05	4.49	1.19	-0.6109
440	Chr12	56554955	56554963	MYL6	TAGGTTTGG	4.84	2.33	12.05	0.49	1.1112
441	Chr12	56554966	56554974	MYL6	GGGGGACTA	4.96	2.39	12.34	0.13	4.1928
442	Chr12	56554976	56554984	MYL6	CAGCTGCTG	2.79	1.35	6.95	0.08	5.6877
443	Chr12	56555070	56555078	MYL6	GTTCCCGCT	3.37	1.62	8.38	0.85	-2.2409
444	Chr12	56555156	56555164	MYL6	CTTTCCTTT	0.39	0.16	0.8	1.04	2.2663
445	Chr17	29546187	29546195	NF1	ACATTCATG	13.96	5.61	72.03	1.22	3.6072
446	Chr17	29546197	29546205	NF1	TGTTCCTTT	1000	26.09	1200	53.55	4.6948
447	Chr17	29546271	29546279	NF1	ATTGTTTTA	34.72	9.69	1109.4	30.71	-1.2261
448	Chr17	29546372	29546380	NF1	ATTTTCTAA	9.21	3.7	33.01	5.41	-0.5724
449	Chr17	29546392	29546400	NF1	TTTAAAATT	1000	64.91	1200	408.5	-2.8601
450	Chr17	29546410	29546418	NF1	ATTATTATT	1000	37.56	1200	297.53	-3.1147
451	Chr17	29546420	29546428	NF1	AATATTAAA	16.41	6.59	84.65	3.4	-1.5957
452	Chr17	29546433	29546441	NF1	CTAATTTTT	16.99	6.83	105.22	10.18	-2.4687
453	Chr17	29546475	29546483	NF1	GCCATTTTA	32.78	9.15	1047.1	18.95	-3.1093
454	Chr17	29546489	29546497	NF1	TTCTTTTTT	25.44	8.52	1170.3	32.44	-3.0094
455	Chr17	29546502	29546510	NF1	ATTTTATTA	38.78	10.82	1032.5	24.49	-1.6204
456	Chr17	29546513	29546521	NF1	ATTGTACTT	21.12	7.07	390.49	11.04	-0.0595
457	Chr17	29546523	29546531	NF1	TAAGTTTTA	17.82	5.97	190.67	7.29	-1.5661
458	Chr17	29546610	29546618	NF1	CATTTAGCA	10.9	4.38	39.07	2.95	-3.3006
459	Chr17	29546655	29546663	NF1	CCCCTAAGT	1.77	0.85	3.67	1.2	-0.551
460	Chr17	29546665	29546673	NF1	GTTCTTATT	2.49	1.2	5.16	2.83	-1.265
461	Chr17	29546678	29546686	NF1	CAGTTGTGC	2.57	1.24	5.33	2.12	-1.8618
462	Chr17	29546714	29546722	NF1	ATTTTTATC	0.88	0.42	1.82	10.71	0.1646
463	Chr17	29546747	29546755	NF1	CATTCCCTC	0.57	0.23	1.19	1.4	0.0655
464	Chr17	29546775	29546783	NF1	CTATTTTCT	12.35	4.96	53.12	5.13	2.0844
465	Chr17	29546798	29546806	NF1	GCTTGTTTT	3.72	1.79	7.71	9.58	-2.0742
466	Chr17	29546844	29546852	NF1	CTTTTATGT	6.5	2.61	19.42	7.51	-1.9964
467	Chr17	29546884	29546892	NF1	CATTTATGT	4.02	1.94	10.01	10.02	-1.5522
468	Chr17	29546908	29546916	NF1	TATTTTCTT	1.52	0.73	3.15	8.09	1.055
469	Chr17	29546918	29546926	NF1	CTTTTTATT	2.13	1.03	4.41	4.84	0.711
470	Chr17	29546933	29546941	NF1	TATTTCATT	118.37	15.93	1055.4	77.94	-1.0937
471	Chr17	29546950	29546958	NF1	CTGTTTTGT	1.14	0.55	2.37	2.51	2.1414
472	Chr17	29546965	29546973	NF1	AGTTATCAG	15.35	6.17	79.23	13.19	-0.4049
473	Chr17	29546983	29546991	NF1	GTTTGGTGT	27.73	9.29	1062.9	8.91	0.3924
474	Chr17	29546995	29547003	NF1	TTCTACTTT	5.42	2.61	13.49	6.68	1.0021
475	Chr17	29547033	29547041	NF1	CATTTGTGT	1000	37.56	1200	111.81	1.5166
476	Chr17	29547059	29547067	NF1	CATATCTCT	38.56	8.97	1026.6	2.85	2.8704
477	Chr17	29547135	29547143	NF1	CTCTTTTTC	4.45	2.14	11.06	3.49	1.4919
478	Chr17	29547158	29547166	NF1	CATTTTATA	6.79	2.73	20.27	5.58	1.5616
479	Chr17	29547189	29547197	NF1	GTTTTAATA	1000	26.09	1200	189.96	1.1453
480	Chr17	29547216	29547224	NF1	CACTTCTTA	9.6	3.86	34.38	9.1	1.3786
481	Chr17	29547232	29547240	NF1	TCTTTTTGA	496	18.63	1028.5	166.33	2.5012
482	Chr17	29547308	29547316	NF1	TATTTTAGC	141.25	15.84	1049.5	35.77	0.3245
483	Chr17	29547318	29547326	NF1	CTTACTACG	55.99	13.02	1035.1	5.96	1.7334
484	Chr17	29547329	29547337	NF1	ATCATTGCT	970.33	21.09	1164.4	263.48	2.3006
485	Chr17	29547375	29547383	NF1	TACATTTCT	1000	37.56	1200	607.53	-1.3901
486	Chr17	29547388	29547396	NF1	GTCTTTTTG	9.34	3.75	27.9	6.81	-0.7866
487	Chr17	29547430	29547438	NF1	CATTTTTTT	13.61	5.47	70.24	16.65	-1.0315
488	Chr17	29547448	29547456	NF1	ATTCAATTT	32.89	9.18	1050.8	34.23	-0.7478
489	Chr17	29547458	29547466	NF1	TATCACTTT	59.88	13.93	1107	19.67	-0.9512
490	Chr17	29547601	29547609	NF1	ATTTTAACT	28.61	9.58	1096.8	10.34	-0.6186
491	Chr17	29547625	29547633	NF1	CATTTATTA	19.1	6.4	204.4	8.39	1.7189
492	Chr17	29547635	29547643	NF1	AACTTATAT	3.81	1.84	9.48	0.88	2.6442
493	Chr17	29547867	29547875	NF1	CACGTTTTT	4.48	1.8	11.15	4.18	-1.1081
494	Chr17	29547897	29547905	NF1	ATTTTAATT	1000	54.09	1200	532.19	-1.9679
495	Chr17	29547912	29547920	NF1	GTTTTTCCT	1000	77.89	1200	542.37	0.8754
496	Chr17	29547935	29547943	NF1	TAAATTATA	4.75	2.29	11.81	5.56	-1.8072
497	Chr17	29547976	29547984	NF1	ATTTTCATT	1000	77.89	1200	410.07	-1.1396
498	Chr17	29548090	29548098	NF1	TTCACAGTT	1.13	0.55	2.35	2.24	-0.9096
499	Chr17	29548194	29548202	NF1	GTTTTTTTT	1.33	0.64	2.75	4.84	-0.5569
500	Chr17	29548215	29548223	NF1	GTTTTAATT	29.55	8.25	1133	19.94	-2.3512
501	Chr17	29548237	29548245	NF1	ATTTATATG	12.86	5.17	55.29	6.34	-1.0765
502	Chr17	29548264	29548272	NF1	TTATTTAAT	16.21	6.51	100.37	5.27	2.2628
503	Chr17	29548276	29548284	NF1	CGTTAGTGT	7.52	3.02	22.45	3.07	0.8704
504	Chr17	29548298	29548306	NF1	TTCCAACTT	3.62	1.75	9.01	1.02	1.8371
505	Chr17	29548327	29548335	NF1	ATACTTTAG	2.4	1.16	4.98	2.21	-0.2178
506	Chr17	29548366	29548374	NF1	CATTTTGCT	6.55	2.63	19.56	1.74	2.5506
507	Chr17	29548383	29548391	NF1	CTTGATTTT	3.78	1.82	9.4	1.67	1.4314
508	Chr17	29548400	29548408	NF1	ATTGCTCTT	5.14	2.48	12.79	3	2.8266
509	Chr17	29548410	29548418	NF1	TCTGTTACA	13.04	5.24	67.28	1.13	2.408
510	Chr17	29548487	29548495	NF1	TATTAATTT	3.15	1.52	7.83	2.56	-0.2235
511	Chr17	29548504	29548512	NF1	CTTCTTACT	7.93	3.19	23.67	2.82	0.6244
512	Chr17	29548523	29548531	NF1	CTTTTTGTT	4.17	2.01	10.37	3.87	-0.0833
513	Chr17	29548539	29548547	NF1	GTTCTTTAA	3.91	1.89	9.73	18.14	-2.8073
514	Chr17	29548560	29548568	NF1	TTATTTTGT	18.83	6.3	241.71	22.96	-0.5815
515	Chr17	29548570	29548578	NF1	TGTTTCTTA	1000	31.3	1200	857.83	-1.4428
516	Chr17	29548584	29548592	NF1	GTTTTTACA	15.66	6.29	96.94	9.68	-0.0348
517	Chr17	29548597	29548605	NF1	TATATTGTT	11.45	4.6	49.25	3.47	0.7662
518	Chr17	29548669	29548677	NF1	GATTTCATT	9.73	3.91	34.88	6.91	-0.7592
519	Chr17	29548684	29548692	NF1	GTATTATTC	4.43	2.14	11.03	1.63	2.7467
520	Chr17	29548699	29548707	NF1	GGTTTGTGT	4.96	2.39	12.35	2.54	0.1805
521	Chr17	29548709	29548717	NF1	CACCAGAGT	4.69	2.26	11.66	5.71	-0.3889
522	Chr17	29548725	29548733	NF1	TTTTTACCT	3.92	1.89	9.75	7.35	-0.2144
523	Chr17	29548767	29548775	NF1	TCAATTTCT	24.77	8.3	1139.7	12.44	-0.736
524	Chr17	29548779	29548787	NF1	CATTTATAA	100.87	16.29	1079.3	33.14	-1.0685
525	Chr17	29548831	29548839	NF1	GTCTTCTCT	4.79	2.31	11.92	8.53	0.0504
526	Chr17	29548844	29548852	NF1	CTTTCTCTT	0.9	0.44	1.88	4.5	2.2069
527	Chr17	29548854	29548862	NF1	TTTAAAAAA	1.2	0.58	2.48	1.72	1.5599
528	Chr17	29548959	29548967	NF1	TTTATTTTT	1000	31.3	1200	712.45	-1.3197
529	Chr17	29548972	29548980	NF1	TTCAACTTT	1000	45.08	1200	812.62	-0.4983
530	Chr17	29548984	29548992	NF1	ATTTTATTT	236.35	18.41	1016.3	349.71	-0.4546
531	Chr17	29548996	29549004	NF1	ATTTTTGTC	121.18	16.31	1080.5	97.59	0.4301
532	Chr17	29549032	29549040	NF1	TACATTGTA	20.83	6.98	222.88	6.26	-0.2825
533	Chr17	29549044	29549052	NF1	CTTACACTT	7.31	3.53	18.19	3.29	1.3638
534	Chr17	29549060	29549068	NF1	TTTTATGGT	176.04	19.74	1090	53.29	-0.1458
535	Chr17	29549073	29549081	NF1	TATTTTATT	23.82	7.98	1095.7	23.36	-0.6227
536	Chr17	29549087	29549095	NF1	TCAAATTAT	213.14	19.92	1099.8	64.34	-0.6769
537	Chr17	29549101	29549109	NF1	TTTCTTGTT	999.64	21.73	1199.6	401.33	0.027
538	Chr17	29549145	29549153	NF1	ATAAATTTT	120.99	16.28	1078.7	38.2	-0.5762
539	Chr17	29549167	29549175	NF1	AATTTTGTC	336.68	18.21	1005.3	87.72	0.6726
540	Chr17	29549204	29549212	NF1	TATTACTTT	1000	37.56	1200	321.2	2.1173
541	Chr17	29549240	29549248	NF1	TATTTTTAA	53.93	12.54	1196.4	16.69	0.4581
542	Chr17	29549283	29549291	NF1	ATTTTGTAA	1000	45.08	1200	330.15	-0.5692
543	Chr17	29549299	29549307	NF1	GTTTTTTCA	1000	45.08	1200	742.01	1.5018
544	Chr17	29549309	29549317	NF1	TTTTTTGAA	14.81	5.95	76.42	8.72	1.073
545	Chr17	29549322	29549330	NF1	GATCTTTCA	1000	26.09	1200	152.34	1.9119
546	Chr17	29549405	29549413	NF1	GCAGAATTT	2.55	1.23	5.29	4.48	-0.4613
547	Chr17	29549424	29549432	NF1	TTCCTAGAT	2.62	1.26	5.43	2.95	-1.0053
548	Chr17	29549510	29549518	NF1	CATTATCTT	21.05	7.05	1162.1	9.57	-2.9433
549	Chr5	78936292	78936300	PAPD4	CATATTGTT	36.11	10.08	1153.7	26.66	-3.8892
550	Chr5	78936309	78936317	PAPD4	ATTTTTATT	5.3	2.56	13.19	11.99	-2.7227
551	Chr5	78936320	78936328	PAPD4	TTTGTTTTC	16.28	6.54	83.98	27.82	-1.7092
552	Chr5	78936334	78936342	PAPD4	CCTTTAAAA	34.43	9.61	1100	14.48	-0.1256
553	Chr5	78936353	78936361	PAPD4	ATTCTTTTC	2.25	1.08	4.66	5.46	1.7584
554	Chr5	78936416	78936424	PAPD4	ATTATTTTT	1.41	0.68	2.92	4.04	0.2579
555	Chr5	78936446	78936454	PAPD4	TACTTTTCT	4.71	2.27	11.72	3.42	-1.1168
556	Chr5	78936466	78936474	PAPD4	ATTTTACTT	5.75	2.77	14.31	2.36	0.8916
557	Chr5	78936492	78936500	PAPD4	GTTTTTCAG	4.7	2.26	11.68	5.92	-0.6832
558	Chr5	78936532	78936540	PAPD4	GCTTTGTTT	25.16	8.43	1157.6	22.05	-1.0921
559	Chr5	78936605	78936613	PAPD4	CTTCTCCAT	9.08	3.65	32.54	2.38	1.8061
560	Chr5	78936622	78936630	PAPD4	TACTTTTAC	1.26	0.61	2.61	4.85	-0.2672
561	Chr5	78936648	78936656	PAPD4	TTACTTTTT	2.37	1.14	4.92	4.07	3.6967
562	Chr5	78936665	78936673	PAPD4	GGATTCAAG	6.4	3.09	15.94	0.86	3.1952
563	Chr5	78936793	78936801	PAPD4	GTTTCCCTA	2.75	1.33	6.84	4.9	-2.0287
564	Chr5	78936834	78936842	PAPD4	TTTTAAATT	1.54	0.74	3.2	2.95	0.0381
565	Chr5	78936846	78936854	PAPD4	TCTTTTTTT	0.62	0.25	1.28	4.04	1.8634
566	Chr5	78936884	78936892	PAPD4	CTTTAGATT	10.48	4.21	37.56	8.79	-1.321
567	Chr5	78936903	78936911	PAPD4	TTATTACTT	48.55	11.29	1077.1	31.73	1.0673
568	Chr5	78936916	78936924	PAPD4	CTGTTTCTT	17.03	5.7	126.54	10.87	0.3809
569	Chr5	78937034	78937042	PAPD4	ATTTATTCC	23.48	7.86	1080	11.23	0.5931
570	Chr5	78937052	78937060	PAPD4	TCTCATGTT	28.89	9.68	1107.7	6.99	-0.6713
571	Chr5	78937073	78937081	PAPD4	AATTTTACA	8.02	3.22	23.95	5.17	0.0498
572	Chr5	78937104	78937112	PAPD4	CTTGCTTTG	31.84	8.89	1017.3	11.64	-1.1423
573	Chr5	78937130	78937138	PAPD4	AATTTTGTT	43.18	10.04	1149.6	8.03	1.99
574	Chr5	78937165	78937173	PAPD4	ATTTTTTAT	4.75	2.29	11.83	5.13	-0.1861
575	Chr5	78937217	78937225	PAPD4	TAATTTAAT	321.05	17.36	1150.4	122.42	-1.7783
576	Chr5	78937227	78937235	PAPD4	CTAAGTTTT	4.1	1.98	10.19	2.79	0.0566
577	Chr5	78937251	78937259	PAPD4	TCACTATGT	0.84	0.41	1.75	2.37	0.1347
578	Chr5	78937261	78937269	PAPD4	TTTTTTTTT	0.34	0.13	0.7	5.32	1.6744
579	Chr5	78937271	78937279	PAPD4	TTTCAAGAG	0.61	0.24	1.26	1.14	1.6483
580	Chr5	78937314	78937322	PAPD4	TATGTTACC	10.06	4.04	30.03	3.67	-0.5891
581	Chr5	78937364	78937372	PAPD4	GATGTATTT	25.06	6.99	1152.9	2.89	1.6509
582	Chr5	78937374	78937382	PAPD4	CTTTCCATT	7.2	3.47	21.5	5.5	-0.1724
583	Chr5	78937397	78937405	PAPD4	TTCTATTTT	25.09	7	1154.4	21.58	-0.0516
584	Chr5	78937412	78937420	PAPD4	TTACTTTTT	1.54	0.74	3.2	4.95	2.3392
585	Chr5	78937422	78937430	PAPD4	TCTCTTTGA	1.46	0.71	3.03	1.79	1.8409
586	Chr5	78937433	78937441	PAPD4	ATGCTTATT	6.62	3.19	19.76	3.3	-0.0616
587	Chr5	78937453	78937461	PAPD4	GATTTCACT	17.31	6.96	107.19	12.32	-1.5194
588	Chr5	78937485	78937493	PAPD4	TTATTAAAT	1000	26.09	1200	457.54	-2.5623
589	Chr5	78937501	78937509	PAPD4	ATTTTTCTC	2.78	1.34	6.91	4.6	-0.2964
590	Chr5	78937516	78937524	PAPD4	TGACATTTT	7.38	2.96	22.03	5.59	0.1545
591	Chr5	78937527	78937535	PAPD4	CTTTGTTTT	0.72	0.35	1.49	6.17	0.5871
592	Chr5	78937538	78937546	PAPD4	TTTCTTTTT	0.82	0.39	1.69	3.22	0.9072
593	Chr5	78937564	78937572	PAPD4	TGTTAATTT	2.96	1.43	6.13	1.67	-0.94
594	Chr5	78937631	78937639	PAPD4	GATTTTTTT	0.58	0.23	1.19	5.17	0.0638
595	Chr5	78937707	78937715	PAPD4	CATTTCCTT	5.07	2.04	12.61	4.52	-3.5912
596	Chr5	78937742	78937750	PAPD4	TTTCAGATT	15.35	6.17	79.19	8.02	-1.7197
597	Chr5	78937763	78937771	PAPD4	TTTTTGGAT	3.2	1.54	6.64	1.91	-1.0617
598	Chr5	78937875	78937883	PAPD4	GCCTTTTTA	4.7	2.26	11.68	7.34	-1.5253
599	Chr5	78937931	78937939	PAPD4	GTAATTTTA	29.63	8.27	1135.8	8.5	-0.4455
600	Chr5	78937945	78937953	PAPD4	CCTTATTAT	1000	45.08	1200	254.95	-0.8851
601	Chr5	78937955	78937963	PAPD4	TTTTACATC	1000	77.89	1200	268.76	1.1855
602	Chr5	78938000	78938008	PAPD4	ATTTTTACT	4.98	2.4	12.39	5.45	0.1864
603	Chr5	78938010	78938018	PAPD4	TTCATATTA	42.5	11.86	1131.4	14.19	1.73
604	Chr5	78938037	78938045	PAPD4	CTTCTAGTT	8.16	3.93	24.36	2.54	-0.734
605	Chr5	78938160	78938168	PAPD4	GTTGTAATT	10.9	4.38	39.05	5.02	-2.3299
606	Chr5	78938172	78938180	PAPD4	ACTTTTTCG	2.45	1.18	5.07	5.84	-1.6983
607	Chr5	78938332	78938340	PAPD4	GTTTATTTT	10.47	4.21	45.04	4.58	0.5949
608	Chr5	78938356	78938364	PAPD4	TTTGTACAT	2.55	1.23	5.28	1.86	0.0174
609	Chr5	78938404	78938412	PAPD4	AATTTCTTT	14.43	5.8	74.45	9.18	-1.5419
610	Chr5	78938487	78938495	PAPD4	CTTTTTCTG	1000	54.09	1200	178.37	2.3995
611	Chr5	78938497	78938505	PAPD4	TATTTAGAA	1000	31.3	1200	120.91	0.328
612	Chr5	78938559	78938567	PAPD4	TATCTTGTA	12.52	5.03	53.83	4.83	0.2523
613	Chr5	78938569	78938577	PAPD4	GTTTTCTTT	14.51	4.86	155.24	5.33	2.6836
614	Chr5	78938605	78938613	PAPD4	CATTAAACT	1000	93.47	1200	249.12	-0.4421
615	Chr5	78938635	78938643	PAPD4	CTTTATTTT	7.32	3.53	21.85	22.8	0.0097
616	Chr5	78938646	78938654	PAPD4	ACTTTTCAG	16.94	6.81	104.88	6.22	2.8674
617	Chr12	53860761	53860769	PCBP2	CTTTTCTAT	1.02	0.49	2.12	2.47	0.54
618	Chr12	53860786	53860794	PCBP2	CATTCATTC	0.74	0.36	1.53	3.83	0.1869
619	Chr12	53860809	53860817	PCBP2	ATTCTATTT	0.67	0.32	1.39	6.18	-1.4866
620	Chr12	53860823	53860831	PCBP2	CCTTACCCT	0.86	0.41	1.77	2.16	0.9197
621	Chr12	53860904	53860912	PCBP2	GTCAATTTT	9.31	3.74	27.79	18.42	-2.2836
622	Chr12	53860931	53860939	PCBP2	TTTCAAATT	3.08	1.48	6.38	8.83	-2.2775
623	Chr12	53860966	53860974	PCBP2	TAAATCTTC	0.24	0.1	0.59	3.65	0.8101
624	Chr12	53860988	53860996	PCBP2	CTGTTTCCT	0.13	0.09	0.32	8.3	3.591
625	Chr12	53861094	53861102	PCBP2	GTTTATTTC	6.26	2.52	18.7	4.97	-0.6835
626	Chr12	53861165	53861173	PCBP2	AAACTTCGT	65.37	12.67	1007.2	4.5	1.4757
627	Chr12	53861250	53861258	PCBP2	GTTTTCATT	11.33	4.55	48.72	1.99	0.6946
628	Chr12	53861347	53861355	PCBP2	TATTTCTTT	0.71	0.34	1.48	5.69	-1.7509
629	Chr12	53861462	53861470	PCBP2	GTGTTTTTT	0.15	0.09	0.38	1.62	-2.7827
630	Chr12	53861474	53861482	PCBP2	TTTTTGTTT	0.25	0.08	0.62	1.81	-2.194
631	Chr12	53861486	53861494	PCBP2	TTTTTATTT	0.14	0.1	0.35	3.37	-2.0472
632	Chr12	53861496	53861504	PCBP2	GTTTCGTTT	0.56	0.23	1.17	1.03	0.0706
633	Chr12	53861564	53861572	PCBP2	CTCATTTTC	5.02	2.42	12.5	0.93	1.6875
634	Chr12	53861574	53861582	PCBP2	CTTGTATCT	2.99	1.44	6.21	0.43	5.5298
635	Chr12	53861630	53861638	PCBP2	AATGATTAA	3.73	1.8	7.74	0.41	-0.4685
636	Chr12	53861665	53861673	PCBP2	TGTTATATT	5.21	2.51	12.97	1.01	-0.2483
637	Chr12	53861689	53861697	PCBP2	GTCTTGTTT	4.31	2.08	10.71	0.62	1.7051
638	Chr12	53861910	53861918	PCBP2	GGTATTTGC	1.78	0.86	3.69	0.63	-0.0805
639	Chr12	53861926	53861934	PCBP2	ATTTTTTTT	0.53	0.21	1.1	2.29	-0.8551
640	Chr12	53861936	53861944	PCBP2	CTTTCTTTT	0.52	0.21	1.08	2.08	-0.5986
641	Chr12	53861977	53861985	PCBP2	ATTATTGAA	3.44	1.66	8.55	0.42	-0.1112
642	Chr12	53862036	53862044	PCBP2	CATTTCATT	3.76	1.81	7.8	2.34	-2.8634
643	Chr12	53862106	53862114	PCBP2	GTATATTTA	3.79	1.83	7.86	1.12	-0.9697
644	Chr12	53862247	53862255	PCBP2	TGTTTAGAC	22.79	7.63	1048.5	2.17	-1.7697
645	Chr12	53862264	53862272	PCBP2	TTTTTGAGG	33.85	9.45	1081.3	1.93	0.3182
646	Chr12	53862290	53862298	PCBP2	CCTTGCTTC	37.79	10.55	1006.1	1.67	3.6928
647	Chr12	53862371	53862379	PCBP2	ACCTTTCGA	8.75	4.22	26.13	1.04	-1.085
648	Chr12	53862381	53862389	PCBP2	CATTATTTC	7.46	3	22.27	3.12	-0.7927
649	Chr12	53862391	53862399	PCBP2	ACACCCTTC	2.85	1.38	5.92	1.08	0.3314
650	Chr12	53862404	53862412	PCBP2	CCACTCTTT	0.69	0.33	1.43	0.88	-0.8225
651	Chr12	53862414	53862422	PCBP2	CTCTTTGGA	3.23	1.56	8.03	0.37	-0.293
652	Chr12	53862426	53862434	PCBP2	TTCCAAGTT	25.88	7.22	1190.7	2.36	-0.9465
653	Chr12	53862474	53862482	PCBP2	TTTATTTCC	5.83	2.34	17.41	1.42	1.2223
654	Chr12	53862487	53862495	PCBP2	GTTAGTTTA	10.64	4.28	31.77	4.4	-1.5414
655	Chr12	53862513	53862521	PCBP2	GTTTTGAAT	3.23	1.56	8.05	1.65	-0.2825
656	Chr12	53862537	53862545	PCBP2	TGCTTGCTC	7.4	2.98	22.11	0.53	2.515
657	Chr12	53862547	53862555	PCBP2	CTTCTGTCT	5.11	2.46	12.71	2.33	3.9438
658	Chr1	97269760	97269768	PTBP2	TATTCATTT	3.18	1.53	7.91	5.76	-2.8746
659	Chr1	97269770	97269778	PTBP2	AATTACTTG	2.97	1.43	6.16	1.61	-2.1023
660	Chr1	97269803	97269811	PTBP2	CATTTTGCT	4.98	2.4	12.39	4.33	-2.784
661	Chr1	97269815	97269823	PTBP2	ATTTTCTTT	8.22	3.3	29.45	6.66	-1.7654
662	Chr1	97269856	97269864	PTBP2	GATTTGTCT	10.56	4.24	37.84	3.4	2.9334
663	Chr1	97269886	97269894	PTBP2	CCTTTGTTT	13.66	5.49	70.48	4.71	-0.2781
664	Chr1	97269908	97269916	PTBP2	TATTTGATT	5.14	2.48	12.78	6.29	0.1698
665	Chr1	97270054	97270062	PTBP2	ATATTTTTC	13.31	5.35	57.21	10.5	-0.5811
666	Chr1	97270067	97270075	PTBP2	TTTGTTTGC	10.3	4.14	36.91	2.66	3.3058
667	Chr1	97270104	97270112	PTBP2	TTTGATATT	32.14	8.97	1026.7	7.86	-0.3526
668	Chr1	97270134	97270142	PTBP2	CTTTAGTTC	1000	45.08	1200	244.31	-1.3823
669	Chr1	97270154	97270162	PTBP2	GGTTTTGTT	5.79	2.79	14.4	5.74	-1.4281
670	Chr1	97270173	97270181	PTBP2	ATTTTTCTT	12.22	4.91	63.05	18.31	-0.2876
671	Chr1	97270199	97270207	PTBP2	CAATTTTTC	65.94	12.78	1015.9	61.4	-1.843
672	Chr1	97270216	97270224	PTBP2	ATAAAAATT	12.86	5.17	55.31	3.51	4.1661
673	Chr1	97270323	97270331	PTBP2	GCTTTATTT	5.88	2.84	14.64	8.77	1.6159
674	Chr1	97270343	97270351	PTBP2	CTTCCTGTT	8.15	3.28	24.34	0.72	3.4883
675	Chr1	97270517	97270525	PTBP2	GTTTATTCT	1000	21.74	1200	601.6	0.9112
676	Chr1	97270533	97270541	PTBP2	CATTTCATT	25.5	7.12	1173.2	16.1	0.6082
677	Chr1	97270549	97270557	PTBP2	GTTTTTCAT	1000	31.3	1200	419.28	0.2096
678	Chr1	97270559	97270567	PTBP2	TTTATTTCA	1000	21.74	1200	717.54	0.4944
679	Chr1	97270569	97270577	PTBP2	TTTGCACTT	92.26	14.9	1184.5	20.48	1.2457
680	Chr1	97270580	97270588	PTBP2	CTTTCTTTT	17.17	5.75	153.09	8.88	1.4917
681	Chr1	97270646	97270654	PTBP2	ACATATTGT	67.52	13.09	1040.3	10.95	2.0148
682	Chr1	97270665	97270673	PTBP2	CTTTATTTC	3.78	1.82	9.41	7.83	2.3362
683	Chr1	97270715	97270723	PTBP2	ATATTTTTT	2.52	1.22	5.23	10.5	-0.1138
684	Chr1	97270733	97270741	PTBP2	TATTTTTCC	1.46	0.7	3.03	0.96	4.0423
685	Chr1	97270774	97270782	PTBP2	CTTATCTTT	2.11	1.02	4.37	5.73	0.4312
686	Chr1	97270837	97270845	PTBP2	TTTTGCTCT	1000	31.3	1200	267.85	1.47
687	Chr1	97270885	97270893	PTBP2	TATGTCATT	28.99	8.09	1111.3	6.7	1.489
688	Chr1	97270895	97270903	PTBP2	CATTTTTTT	9.4	3.78	33.68	24.87	-0.4636
689	Chr1	97270908	97270916	PTBP2	TCTTATTTT	8.59	3.45	30.79	15.28	-0.119
690	Chr1	97270935	97270943	PTBP2	CATTTTTCT	2.04	0.98	4.22	7.45	2.8186
691	Chr1	97270950	97270958	PTBP2	GTTCTTCCA	9.93	3.99	35.58	8.16	0.7085
692	Chr1	97270984	97270992	PTBP2	GTCTTTCTT	1.56	0.75	3.24	3.18	0.6602
693	Chr1	97270997	97271005	PTBP2	ATTTTTTCT	0.51	0.21	1.06	6.77	1.0094
694	Chr1	97271008	97271016	PTBP2	GCAGTTATT	2.36	1.14	5.87	4.48	-0.777
695	Chr1	97271020	97271028	PTBP2	CATTGTCTT	1.81	0.87	3.75	10.54	-1.9853
696	Chr1	97271035	97271043	PTBP2	ATATTTTTT	0.39	0.16	0.8	10.78	0.2717
697	Chr1	97271045	97271053	PTBP2	ACTTTATTC	0.1	0.08	0.21	4.54	1.5693
698	Chr1	97271062	97271070	PTBP2	CTTCCTTCC	0.1	0.08	0.14	10.74	-0.2126
699	Chr1	97271111	97271119	PTBP2	AGTTATTTT	1.16	0.56	2.4	8.46	-0.559
700	Chr1	97271148	97271156	PTBP2	ATTTTATTT	0.1	0.08	0.17	8.89	-0.004
701	Chr1	97271226	97271234	PTBP2	ATTTGTTTC	1.83	0.88	3.8	4.5	0.9422
702	Chr1	97271268	97271276	PTBP2	GCTTATTTT	5.64	2.72	14.03	9.65	-0.2914
703	Chr1	97271289	97271297	PTBP2	CTATTATCA	4.21	2.03	10.47	1.69	2.5975
704	Chr1	97271342	97271350	PTBP2	TTTTTATTT	0.63	0.25	1.31	5.54	1.352
705	Chr1	97271425	97271433	PTBP2	GCTTTCCTT	0.55	0.22	1.14	2.26	2.9067
706	Chr1	97271507	97271515	PTBP2	CTACATTTT	1.64	0.79	3.41	3.02	0.4339
707	Chr1	97271520	97271528	PTBP2	AGTTTTTCT	0.48	0.19	0.99	3.52	-0.3552
708	Chr1	97271548	97271556	PTBP2	CCATTTTCT	1.09	0.53	2.26	3.55	-0.5081
709	Chr1	97271570	97271578	PTBP2	CATTTCCTA	1.1	0.53	2.28	4.22	-1.7965
710	Chr1	97271592	97271600	PTBP2	ATTTTATTT	0.27	0.09	0.67	12.44	-1.2587
711	Chr1	97271602	97271610	PTBP2	GTTTTTGTT	0.71	0.34	1.46	6.8	-0.4689
712	Chr1	97271620	97271628	PTBP2	CTTATTTTT	0.1	0.08	0.14	16.15	-1.8477
713	Chr1	97271630	97271638	PTBP2	TCTTCTGCA	0.1	0.08	0.17	2.84	-0.5701
714	Chr1	97271643	97271651	PTBP2	TGTTTCCCT	0.1	0.08	0.21	3.61	-1.2983
715	Chr1	97271655	97271663	PTBP2	CCATTTCAT	0.1	0.08	0.25	3.63	-1.7894
716	Chr1	97271665	97271673	PTBP2	CTTTTCCCT	0.1	0.08	0.14	6.01	-1.9159
717	Chr1	97271684	97271692	PTBP2	CTTCCCTTT	0.1	0.08	0.14	12.38	-3.7869
718	Chr1	97271694	97271702	PTBP2	CTTGTCTTT	0.1	0.08	0.14	10.26	-1.9928
719	Chr1	97271712	97271720	PTBP2	CCCATTCCC	0.1	0.08	0.17	5.47	-2.2437
720	Chr1	97271722	97271730	PTBP2	TCCCTGTCT	0.1	0.08	0.14	8.25	-1.6117
721	Chr1	97271734	97271742	PTBP2	CCTTTATTT	0.1	0.08	0.14	23.5	-2.5425
722	Chr1	97271744	97271752	PTBP2	CCTTGTCCT	0.1	0.08	0.14	4.69	-1.5816
723	Chr1	97271754	97271762	PTBP2	GTCTTCATT	0.18	0.09	0.46	2.12	0.3728
724	Chr1	97271767	97271775	PTBP2	GTCTCCATT	0.63	0.25	1.31	5.35	-1.7067
725	Chr1	97271928	97271936	PTBP2	CTTCTCTCT	0.3	0.1	0.62	2.12	-1.8791
726	Chr1	97271952	97271960	PTBP2	CTTGCTCTT	0.84	0.41	1.75	1.23	1.2921
727	Chr1	97272048	97272056	PTBP2	ATTTTTGTT	2.83	1.36	7.04	8.5	-1.4861
728	Chr1	97272085	97272093	PTBP2	CTTTGGCTT	8.52	4.11	25.43	5.78	-1.871
729	Chr1	97272108	97272116	PTBP2	AATCTTTTG	13.35	5.37	57.41	8.14	-2.4824
730	Chr1	97272157	97272165	PTBP2	ATTTGTTTT	1000	26.09	1200	661.19	-2.1365
731	Chr1	97272176	97272184	PTBP2	AATTTATTT	17.22	5.77	153.54	11.54	-1.7378
732	Chr1	97272193	97272201	PTBP2	CTTTAATTT	99.94	16.14	1069.3	30.89	-1.2086
733	Chr1	97272239	97272247	PTBP2	TATTCTTTT	8.79	3.53	31.51	7.73	-0.9262
734	Chr1	97272259	97272267	PTBP2	GTTCAAAAT	14.67	4.91	90.82	8.09	-1.2913
735	Chr1	97272278	97272286	PTBP2	TTTATTCAT	6.76	2.72	20.19	10.18	-0.4925
736	Chr1	97272328	97272336	PTBP2	ATGTTTCAT	1000	31.3	1200	124.12	1.7809
737	Chr1	97272352	97272360	PTBP2	ATAATCTTT	30.75	8.58	1178.8	5.18	1.8466
738	Chr1	97272383	97272391	PTBP2	ATTCCATTT	6.11	2.95	15.2	3.86	1.1524
739	Chr1	97272396	97272404	PTBP2	ATTACCTCT	5.29	2.55	13.16	1.56	3.5618
740	Chr1	97272406	97272414	PTBP2	TGTGGCTCC	4.86	2.34	12.09	0.18	5.2908
741	Chr11	122016823	122016831	MIRLET7A	GAAGAAATG	7.07	2.84	21.12	2.27	N.A.
742	Chr11	122016845	122016853	MIRLET7A	CCAGAAAAC	5.64	2.72	14.04	0.85	N.A.
743	Chr11	122016860	122016868	MIRLET7A	AAATCACAG	8.28	3.33	24.73	1.75	N.A.
744	Chr11	122016886	122016894	MIRLET7A	CTAAATATG	14.55	5.85	75.09	2.29	N.A.
745	Chr11	122016970	122016978	MIRLET7A	GACAATTTG	61.28	14.25	1133	10.75	N.A.
746	Chr11	122017007	122017015	MIRLET7A	ATGGACACC	1000	26.09	1200	107.55	N.A.
747	Chr11	122017054	122017062	MIRLET7A	AAACAAAAT	3.38	1.63	8.41	5.54	N.A.
748	Chr11	122017075	122017083	MIRLET7A	AACAGAATA	2.5	1.21	6.22	2.62	N.A.
749	Chr11	122017085	122017093	MIRLET7A	GAAAATACA	7.05	2.83	21.06	2.32	N.A.
750	Chr11	122017102	122017110	MIRLET7A	ACAAGGATT	8.01	3.22	23.93	0.58	N.A.
751	Chr11	122017112	122017120	MIRLET7A	AACAAAACT	101.05	16.32	1081.1	26.82	N.A.
752	Chr11	122017124	122017132	MIRLET7A	ATTCTAAAA	27.85	9.33	1067.8	7.83	N.A.
753	Chr11	122017139	122017147	MIRLET7A	AAAATAATC	57.43	13.36	1061.8	14.79	N.A.
754	Chr11	122017171	122017179	MIRLET7A	GGAGAAAAG	2.89	1.39	6	0.58	N.A.
755	Chr11	122017184	122017192	MIRLET7A	GGAGGAATC	14.25	5.73	61.29	1.7	N.A.
756	Chr11	122017269	122017277	MIRLET7A	AATTCTAAA	6.25	3.01	15.55	2.31	N.A.
757	Chr11	122017313	122017321	MIRLET7A	GTCACAATG	29.17	8.14	1118.4	2.83	N.A.
758	Chr11	122017326	122017334	MIRLET7A	GAAAACTAC	7.57	3.04	22.6	0.87	N.A.
759	Chr11	122017339	122017347	MIRLET7A	TCTTAAGCA	12.2	4.9	43.71	1.07	N.A.
760	Chr11	122017349	122017357	MIRLET7A	GGAAATTAC	1000	26.09	1200	97.55	N.A.
761	Chr11	122017359	122017367	MIRLET7A	AGTTAGTCT	1000	64.91	1200	45.59	N.A.
762	Chr11	122017369	122017377	MIRLET7A	ATAATGATT	40.39	11.27	1075.4	3.21	N.A.
763	Chr11	122017410	122017418	MIRLET7A	AGAGACAAC	18.64	6.24	857.64	0.61	N.A.
764	Chr11	122017421	122017429	MIRLET7A	ATCAAAGAG	11.46	4.61	41.08	2.37	N.A.
765	Chr11	122017453	122017461	MIRLET7A	AAAAACCTT	165.48	18.56	1024.6	12.28	N.A.
766	Chr11	122017478	122017486	MIRLET7A	GAAAACATG	16.46	6.62	101.93	3.91	N.A.
767	Chr11	122017496	122017504	MIRLET7A	AATACTTGG	6.41	3.09	15.96	1.36	N.A.
768	Chr11	122017535	122017543	MIRLET7A	AAATTATAG	2.87	1.38	5.95	0.58	N.A.
769	Chr11	122017545	122017553	MIRLET7A	AATGTTACA	36.77	10.26	1174.6	2.8	N.A.
770	Chr11	122017600	122017608	MIRLET7A	AAATAGAAT	1000	26.09	1200	146.06	N.A.
771	Chr11	122017619	122017627	MIRLET7A	TATTTAAAC	89.75	14.5	1152.4	11.78	N.A.
772	Chr11	122017629	122017637	MIRLET7A	TGGGCAATT	6.25	3.02	15.56	0.76	N.A.
773	Chr11	122017639	122017647	MIRLET7A	AAAAAAGAT	10.68	4.29	38.29	7.25	N.A.
774	Chr11	122017652	122017660	MIRLET7A	AAAATAAAT	23.86	7.99	1097.8	18.14	N.A.
775	Chr11	122017675	122017683	MIRLET7A	ACTGAAAAA	9.51	3.82	28.39	2.86	N.A.
776	Chr11	122017696	122017704	MIRLET7A	AAAGATGGA	6.09	2.94	15.16	1.04	N.A.
777	Chr11	122017711	122017719	MIRLET7A	AGAAGAAAT	4.56	2.2	11.36	2.45	N.A.
778	Chr11	122017726	122017734	MIRLET7A	AACCAAAAC	21.34	7.15	681.72	3.07	N.A.
779	Chr11	122017739	122017747	MIRLET7A	TGAAAAGAC	262.79	20.47	1129.9	36.98	N.A.
780	Chr11	122017751	122017759	MIRLET7A	GAAAACATG	1000	26.09	1200	161.53	N.A.
781	Chr11	122017800	122017808	MIRLET7A	ATATTGAAC	4.16	2.01	10.35	0.95	N.A.
782	Chr11	122017934	122017942	MIRLET7A	ACAAAATGT	8.39	3.37	25.06	1.32	N.A.
783	Chr11	122018182	122018190	MIRLET7A	CTCAAACTC	3.02	1.46	6.26	2.68	N.A.
784	Chr11	122018211	122018219	MIRLET7A	CCTCATAAT	2.96	1.43	6.14	0.82	N.A.
785	Chr11	122018417	122018425	MIRLET7A	AAAGGCTGT	2.67	1.29	5.54	0.5	N.A.
786	Chr11	122018429	122018437	MIRLET7A	ACAAAGGAG	2.27	1.09	4.7	2.28	N.A.
787	Chr11	122018439	122018447	MIRLET7A	TAGGTCAGC	10.64	4.27	31.76	1.42	N.A.
788	Chr11	122018525	122018533	MIRLET7A	AAAGACAGA	1.91	0.92	3.97	2.65	N.A.
789	Chr11	122018537	122018545	MIRLET7A	AAATGCCAT	9.63	3.87	34.52	1.4	N.A.
790	Chr11	122018547	122018555	MIRLET7A	GCATTGATG	3.14	1.51	6.51	0.69	N.A.
791	Chr11	122018708	122018716	MIRLET7A	GAGAAAGAC	70.31	13.63	1083.3	3.96	N.A.
792	Chr11	122018736	122018744	MIRLET7A	AAAAAAAAA	2.16	1.04	4.48	7.8	N.A.
793	Chr11	122018746	122018754	MIRLET7A	AAAACTCTC	1000	21.74	1200	164.51	N.A.
794	Chr11	122018773	122018781	MIRLET7A	ATTTGAAAG	5.06	2.44	12.6	1.23	N.A.
795	Chr11	122018895	122018903	MIRLET7A	AAATGGGAC	3.03	1.46	7.53	0.94	N.A.
