# Supplementary material for: In vitro iCLIP-based modeling uncovers how the splicing factor U2AF2 relies on regulation by cofactors
Source: HighWire-hosted journal article supplement (doi:10.1101/gr.229757.117), 2018-04-11
Supplement: Supplemental_Table_S3.xlsx [file Supplemental_Table_S3.xlsx]

## Sheet: Sheet1
Supplemental Table S3. Kd measurements with in vitro iCLIP, microscale thermophoresis (MST) and isothermal titration calorimetry (ITC) for eight selected oligonucleotides. For each oligonucleotide, genomic coordinates and sequence are indicated (with pyrimidines labeled in red). The Kd values measured with three different methods (in vitro iCLIP, MST, ITC) are given either as mean of two or three…
Oligo name	Genomic position			Sequence	in vitro iCLIP			MST				ITC				Accesibility score
	Chr	start	end		best fit Kd (µM)	lowest Kd	highest Kd	Kd (µM)	lowest Kd	highest Kd	stdev	Kd (µM)	lowest Kd	highest Kd	stdev
OR1	Chr8	128751896	128751932	CUGCAATTTTTTTTTTTTTATTTTTCATTTCCAGTA	0.13	0.09	0.39	5.33672	3.51795	7.15549	1.60727	0.291	0.138551	0.443449	0.11	0.235669
OR2	Chr11	65269035	65269053	AAAATGTTTTTTTCTAAGA	0.99	0.48	2.05	7.45703	7.42181	7.49225	0.0311228	0.463	0.304578	0.621422	0.14	0.08
OR3	Chr1	207513317	207513336	AGGTCCTTTCTTCTAGTGA	1.28	0.62	2.66	7.79844	6.37395	9.22292	1.25884	-	-	-	-	0.0633519
OR4	Chr1	207269096	207269113	GGGTGGATTTCTCATGAA	1.25	0.6	2.59	21.7242	19.4648	23.9837	1.99672	8.6	3.50786	13.6921	4.5	0.012241
OR5	Chr12	56554916	56554938	AGTGGAGAACTTTTCTGCCTCTG	1.75	0.84	3.63	29.7023	22.2862	37.1185	6.55377	20.75	19.3	22.22	1.06066	0.0585259
OR6	Chr2	85768883	85768904	AGGCTGTTTTAATCTCTTCTAA	1.47	0.71	3.04	11.509	10.1719	12.8461	1.18164	2.415	2.17	2.66	0.176777	0.0726665
OR7	Chr12	53861340	53861358	AGGCTGATATTTCTTTGAG	0.71	0.34	1.48	4.43828	1.6661	7.21046	2.44982	3.37	2.8015	3.9385	0.502394	0.0840798
OR8	Chr1	207269352	207269371	AAACCTCTTTTCTTTATAAA	0.34	0.11	0.84	4.18672	2.56783	5.8056	1.43063	0.914	0.275052	1.55295	0.461034	0.475328
