# Supplementary material for: In vitro iCLIP-based modeling uncovers how the splicing factor U2AF2 relies on regulation by cofactors
Source: HighWire-hosted journal article supplement (doi:10.1101/gr.229757.117), 2018-04-11
Supplement: Supplemental_Table_S4.xlsx [file Supplemental_Table_S4.xlsx]

## Sheet: Features_ranked_by_MeanDecrease
Supplemental Table S4. Top 100 features from Random Forests machine learning. The identified features, including positional features, PSSM matches (represented by RBP names) and k-mers, are ordered by their importance scores. Position indicates the region around the binding site where the feature occurs (extended, 19-nt window around binding site; upstream/downstream, flanking 40-nt windows; see …
Feature	Position	Importance	RBP match
dist_to_3SS	N.A.	81.31
dist_to_AG	N.A.	74.6
TTTCCT	upstream	52.95	PTBP3,PTBP2,U2AF2,PTBP1,PCBP2,PCBP3,PCBP4
TGTCCT	downstream	42.13
hnRNPC,hnRNPCL1,RALY,TIA1	downstream	40.89
RBM28	upstream	39.19
TTAAAT	downstream	34.89	KHDRBS1
TGAGAT,GAGATG	upstream	34.83	BX511012.1,SRSF10,ENSG00000180771,SRSF2,SRSF12,MEX3B,MEX3D,MEX3C
TTTGTT	downstream	33.79	ELAVL3,hnRNPCL1,CELF5,CELF3,SF3B4,CPEB2,RALY,PSPC1,SFPQ,TIA1,CPEB4,CPEB3,CELF4,hnRNPC,ZNF638,ELAVL1,U2AF2
CCCTGG	downstream	32.2
SRSF9	downstream	31.53
A1CF	downstream	31.12
CTTTCT	downstream	29.56	CPEB2,PTBP3,PTBP2,CPEB3,U2AF2,PTBP1,PCBP2,PCBP3,PCBP1,PCBP4
AATTAA	downstream	29.55	RBM47,RBM46,DAZAP1,MEX3B,MEX3D,MEX3C,KHDRBS2
TAAAAT	upstream	28.77	ENSG00000250177,PABPC5,PABPC3,SYNCRIP,hnRNPR,PABPC1L,SART3,PABPC1,KHDRBS3,KHDRBS1
U2AF2	downstream	27.79
ATGAAT	upstream	27.77	RBM47,RBM46
TCCCTG	downstream	27.64
TCTTTT	upstream	27.6	ELAVL3,hnRNPCL1,SF3B4,CPEB2,RALY,PTBP3,PTBP2,TIA1,CPEB4,CPEB3,hnRNPC,ELAVL1,U2AF2,PTBP1
dist_to_5SS	N.A.	27.43
CCTGTG	downstream	27.23
TTTTTC	downstream	27.05	ELAVL3,hnRNPCL1,SF3B4,CPEB2,RALY,PTBP3,PTBP2,TIA1,CPEB4,CPEB3,hnRNPC,ELAVL1,U2AF2,PTBP1,PCBP3,PCBP4
CATTTC	N.A.	25.42	PTBP3,PTBP2,PTBP1,PCBP3,PCBP1,PCBP4
CCCAAA	upstream	24.93	ENSG00000215042,hnRNPL
CAGTTC	downstream	24.88
ATGTTT	upstream	24.6	ELAVL3,hnRNPCL1,CELF3,SF3B4,RBM38,hnRNPC,ELAVL1
TACCCT	upstream	24.33	PCBP3,PCBP4
AAAGTT	downstream	23.81	SF3B4
GCCTCC	downstream	23.18	PCBP2,PCBP3,PCBP4
TTTGAG	downstream	23.06	CPEB3
TCCAGC	downstream	22.86
TATGAA	upstream	22.84	RBM47,RBM46,TARDBP,FXR1
CCTTTA	downstream	22.72	PTBP3,PTBP2,PTBP1,PCBP3,PCBP1,PCBP4
TGAATT	upstream	22.45	MEX3B,MEX3D,MEX3C
ATAAAA	downstream	22.42	ENSG00000250177,ENSG00000215042,RBNS2P1,PABPC5,RBMS3,SF3B4,SYNCRIP,hnRNPR,hnRNPL,RBM3,PABPC1L,CIRBP,PABPC4,RBMS2,SART3,PABPC1,KHDRBS3,KHDRBS1,KHDRBS2
GAGGAA	downstream	22.13	BX511012.1,SRSF10,ENSG00000180771,SRSF2,RBM45,SRSF12,SRSF1,SRSF6,SRSF4,MEX3B,MEX3D,MEX3C
CTTCTA	upstream	22.02
SF3B4	downstream	21.82
TCCTTG	downstream	21.71	MBNL1,MBNL2,MBNL3
TTATTC	upstream	21.48	ELAVL3,SF3B4,TIA1,ELAVL1,U2AF2,PCBP3,PCBP4
ATTTCA	N.A.	21.43
TTTTGG	downstream	20.95	ELAVL3,CELF5,CELF3,RALY,TIA1,CPEB3,CELF4,ZNF638,ELAVL1
AGTTTT	upstream	20.74	hnRNPCL1,CELF5,CELF3,SF3B4,CELF4,hnRNPC,MEX3B,MEX3D,MEX3C
GTCCTG	downstream	20.63
TAATGT	downstream	20.58	PSPC1,SFPQ
TTCCAC	downstream	20.45	SNRPB2,SNRPA,RBM6
TTAATT	downstream	20.26	ELAVL3,A1CF,SF3B4,PSPC1,SFPQ,ELAVL1
ATTTGT	upstream	20.16	ELAVL3,hnRNPCL1,CELF3,SF3B4,CPEB4,CPEB3,hnRNPC
GTGAGA	upstream	20.1	ENSG00000180771,SRSF2,CELF3,CELF6,RBM38,RBM24
GGAGAG	upstream	19.97	BX511012.1,Fusip1,ENSG00000180771,SRSF2,SRSF12,SRSF1,SRSF6,SRSF4,SRSF9
ELAVL1,ELAVL3	downstream	19.72
TGTAAA	downstream	19.67	MEX3B,MEX3D,MEX3C
GTAAAA	upstream	19.53	ENSG00000250177,SF3B4,PABPC1L,SART3,PABPC1,KHDRBS1,KHDRBS2
ATTTCC	upstream	19.13	PTBP3,PTBP2,U2AF2,PTBP1,PCBP3,PCBP1,PCBP4
GAATGA	upstream	18.92	G3BP2,SRSF1,TARDBP,MEX3B,MEX3D,MEX3C
TTTTTG	downstream	18.77	ELAVL3,hnRNPCL1,CELF5,CELF3,SF3B4,CPEB2,RALY,PTBP3,PTBP2,TIA1,CPEB4,CPEB3,CELF4,hnRNPC,ELAVL1,U2AF2,PTBP1
ATAGCT	downstream	18.77
AATTTT	downstream	18.76	ELAVL3,hnRNPCL1,SF3B4,CPEB2,CPEB4,CPEB3,hnRNPC,ELAVL1,MATR3
BX511012.1,SRSF10,SRSF12	downstream	18.67
AGCTTT	downstream	18.52	MBNL1,MBNL2,MBNL3
GCTTGG	upstream	18.42	MBNL1,MBNL2,MBNL3
TAAATA	downstream	18.4	SYNCRIP,hnRNPR,DAZAP1,KHDRBS3,KHDRBS1
TGTGCT,GTGCTT	downstream	18.4	ZNF638,CELF3,CELF6,RBM38
CACCCA	upstream	18.29	ENSG00000215042,hnRNPLL,hnRNPL
CATAGA	upstream	18.28	RBNS2P1,RBMS1,RBMS3,RBMS2
TTTTCA	upstream	18.22	RALY,PTBP3,PTBP2,TIA1,U2AF2,PTBP1
AGGAAG	upstream	18.14	BX511012.1,SRSF10,SRSF12,MSI2,hnRPDL,G3BP2,MSI1,DAZAP1,MEX3B,MEX3D,MEX3C
CPEB3	downstream	17.99
TTTGTG	downstream	17.81	ELAVL3,CELF5,CELF3,RBM38,RALY,PSPC1,SFPQ,TIA1,CPEB3,CELF4,ELAVL1
GGAAAA	downstream	17.78	ENSG00000250177,PABPC5,SRSF1,SRSF9,PABPC1L,PABPC4,SART3,PABPC1
ATTTTG	downstream	17.73	hnRNPCL1,CELF3,SF3B4,CPEB2,RALY,PTBP3,PTBP2,TIA1,CPEB4,CPEB3,hnRNPC,MATR3,PTBP1
TCTGTA	upstream	17.62
ATAATT	downstream	17.52	ELAVL3,A1CF,SF3B4,ELAVL1,KHDRBS2
TAACAA	upstream	17.49
TGTACA,GTACAT	downstream	17.45	RBM41,ENOX2,SNRPB2,ENOX1,SNRPA
ATTTGC	upstream	17.41	PCBP3,PCBP4
CTGGAA	upstream	17.22	SAMD4B,SAMD4A,SF3B4
TTAAAT	extended	17.1	KHDRBS1
AATGTT	upstream	17.06	SF3B4,TARDBP,MATR3
TGTGAA	downstream	16.96	RBM38
AATGTA	downstream	16.6	TARDBP,MEX3B,MEX3D,MEX3C
KHDRBS3	downstream	16.48
TTACTT	downstream	16.44	ELAVL3,RBM41,ELAVL1
CTGAAA	upstream	16.43	RBM47
AAACTT	downstream	16.37	MATR3
ATGTCA	downstream	16.26
PCBP3,PCBP4	downstream	16.24
TATTGT	downstream	16.2	ELAVL3,CELF3,PSPC1,SFPQ,ELAVL1
CAGCCT	pstream	16.16
AGTAGT	upstream	16.15	MSI2,MSI1,RBM28
py_tract_scores	N.A.	16.13
GCCTCC	upstream	16.1	PCBP2,PCBP3,PCBP4
TTCCTT	upstream	16.09	PCBP3,PCBP4
CAGAAG,GAAGCC	downstream	16.08	PABPN1L,SRSF9,PABPN1,SF3B4
AATTTT	extended	16.03	ELAVL3,hnRNPCL1,SF3B4,CPEB2,CPEB4,CPEB3,hnRNPC,ELAVL1,MATR3
ATCCTT	downstream	15.94
GGAGGA	downstream	15.94	ENSG00000180771,hnRNPF,hnRNPH1,SRSF2,G3BP2,SRSF1,hnRNPH2,SRSF6,SRSF4,SRSF9,MEX3B,MEX3D,MEX3C
TATGGA	downstream	15.92	hnRNPA1P36,hnRNPA1P7,hnRNPA3,SF3B4,hnRNPA1,TARDBP,SRSF9
TGGTTT	downstream	15.87	ELAVL3,PSPC1,SFPQ,ELAVL1
CAGTCT	downstream	15.8
