# Supplementary material for: In vitro iCLIP-based modeling uncovers how the splicing factor U2AF2 relies on regulation by cofactors
Source: HighWire-hosted journal article supplement (doi:10.1101/gr.229757.117), 2018-04-11
Supplement: Supplemental_Table_S5.docx [file Supplemental_Table_S5.docx]

**Supplemental Table S5. Assignment of RBPs and *k*-mers from the top 100 features of the Random Forests analysis to 13 regulatory groups**. For each regulatory group (**Fig. 4B**), the table lists the associated RBPs that belong to the same protein family and/or share a similar motif, as well as the associated *k*-mers that are linked to the motifs of the respective RBPs. Note that no *k*-mer of the regulatory group ‘*RBFOX’* was included in the top 100 features of the Random Forests analysis.

| **Group** | **RBP members** | **Associated top 100 *k*-mers** |
| --- | --- | --- |
| *CELF* | CELF3, CELF4, CELF5, CELF6 | TTTGTT, ATGTTT, TTTTGG, AGTTTT, ATTTGT, GTGAGA, TTTTTG, TGTGCT, GTGCTT, TTTGTG, ATTTTG, TATTGT |
| *ELAV* | ELAVL1, ELAVL3 | TTTGTT, TCTTTT, TTTTTC, ATGTTT, TTATTC, TTTTGG, TTAATT, ATTTGT, TTTTTG, AATTTT, TTTGTG, ATAATT, TTACTT, TATTGT, TGGTTT |
| *FUBP* | FUBP1 | TTTGTT, TTTTGG, TTTTTG, TTTGTG, TGGTTT |
| *HNRNPC* | hnRNPC, hnRNPCL1, hnRNPCL2 | TTTGTT, TCTTTT, TTTTTC, ATGTTT, TTTTGG, AGTTTT, ATTTGT, TTTTTG, AATTTT, TTTTCA, TTTGTG, ATTTTG |
| *other HNRNP* | CIRBP, ENSG00000215042, hnRNPA1P7, hnRNPA1P36, hnRNPA1, hnRNPA1L2, hnRNPA2B1, hnRNPA3, hnRNPF, hnRNPH1, hnRNPH2, hnRNPK, hnRNPL, hnRNPLL, hnRNPR, hnRNPD | TAAAAT, CCCAAA, ATAAAA, TAAATA, CACCCA, AGGAAG, GGAGGA, TATGGA |
| *MBNL* | MBNL1, MBNL2, MBNL3 | TCCTTG, AGCTTT, GCTTGG |
| *PCBP* | PCBP1, PCBP2, PCBP3, PCBP4 | TTTCCT, CTTTCT, TTTTTC, CATTTC, TACCCT, GCCTCC, CCTTTA, TTATTC, ATTTCC, ATTTGC, TTCCTT |
| *PTB* | PTBP1, PTBP2, PTBP3 | TTTCCT, CTTTCT, TCTTTT, TTTTTC, CATTTC, CCTTTA, ATTTCC, TTTTTG, TTTTCA, ATTTTG |
| *RBFOX* | RBFOX1, RBFOX2, RBFOX3 |  |

*(continued on next page)*

*(continued from previous page)*

| **Group** | **RBP members** | **Associated top 100 *k*-mers** |
| --- | --- | --- |
| *RBM* | ESRP1, ESRP2, RBM24, RBM28, RBM3, RBM38, RBM4, RBM41, RBM42, RBM45, RBM46, RBM47, RBM6, RBM8A, RBMS1, RBMS2, RBMS2P1, RBMS3 | AATTAA, ATGAAT, ATGTTT, TATGAA, ATAAAA, GAGGAA, TTCCAC, GTGAGA, TGTGCT, GTGCTT, CATAGA, TTTGTG, TGTACA, GTACAT, TGTGAA, TTACTT, CTGAAA, AGTAGT |
| *SR proteins* | BX511012.1, SRSF1, SRSF2, SRSF3, SRSF4, SRSF6, SRSF8, SRSF9, SRSF10, SRSF12, TUT1 | TGAGAT, GAGATG, GAGGAA, GTGAGA, GGAGAG, GAATGA, AGGAAG, GGAAAA, CAGAAG, GAAGCC, GGAGGA, TATGGA |
| *other splice factors (SF)* | SF3B4, SFPQ, SNRNP70, SNRPA, SNRPB2, U2AF2 | TTTCCT, TTTGTT, CTTTCT, TCTTTT, TTTTTC, ATGTTT, AAAGTT, ATAAAA, TTATTC, AGTTTT, TAATGT, TTCCAC, TTAATT, ATTTGT, GTAAAA, ATTTCC, TTTTTG, AATTTT, TTTTCA, TTTGTG, ATTTTG, ATAATT, TGTACA, GTACAT, CTGGAA, AATGTT, TATTGT, CAGAAG, GAAGCC, TATGGA, TGGTTT |
| *other* | A1CF, ANKHD1, ANKRD17, CNOT4, CPEB2, CPEB3, CPEB4, CSDA, DAZAP1, EIF2S1, ENOX1, ENOX2, ENSG00000249536, ENSG00000250177, FMR1, FXR1, FXR2, G3BP2, KHDRBS1, KHDRBS2, KHDRBS3, MATR3, MEX3B, MEX3C, MEX3D, MSI1, MSI2, PABPC1, PABPC1L, PABPC3, PABPC4, PABPC5, PABPN1, PABPN1L, PPRC1, PSPC1, QKI, SAMD4A, SAMD4B, SART3, SYNCRIP, TARDBP, TIA1, YBX1, YBX2, ZC3H10, ZNF638 | TTAAAT, TGAGAT, GAGATG, TTTGTT, CTTTCT, AATTAA, TAAAAT, TCTTTT, TTTTTC, TTTGAG, TATGAA, TGAATT, ATAAAA, GAGGAA, TTATTC, TTTTGG, AGTTTT, TAATGT, TTAATT, ATTTGT, TGTAAA, GTAAAA, GAATGA, TTTTTG, AATTTT, TAAATA, TGTGCT, GTGCTT, TTTTCA, AGGAAG, TTTGTG, GGAAAA, ATTTTG, ATAATT, TGTACA, GTACAT, CTGGAA, AATGTT, AATGTA, AAACTT, TATTGT, AGTAGT, CAGAAG, GAAGCC, GGAGGA, TATGGA, TGGTTT |
