# Supplementary material for: In vitro iCLIP-based modeling uncovers how the splicing factor U2AF2 relies on regulation by cofactors
Source: HighWire-hosted journal article supplement (doi:10.1101/gr.229757.117), 2018-04-11
Supplement: Supplemental_Table_S6.docx [file Supplemental_Table_S6.docx]

**Supplemental Table S6. Mutations in the minigene constructs of *PTBP2* exon 10**. For each binding site mutation, the table lists the genomic coordinates of the mutated region, the type of mutation and the identification number of the respective U2AF2 binding site (see **Supplemental Table S2**). Note that BS2 corresponds to a cluster of 14 U2AF2 binding sites (no. 709-722). For BS2sub, sequence and genomic coordinates of the inserted U2AF2 binding site are given. For BS3mut, four pyrimidines were mutated to purines (indicated in red) to abrogate U2AF2 binding.

| **Mutant** | **Mutated region** | **Mutation** | **No. of U2AF2 binding site** |
| --- | --- | --- | --- |
| BS1del | Chr1:97271911-97271945 | deleted | 725 |
| BS2del | Chr1:97271587-97271751 | deleted | 709-722 |
| BS2sub | Chr1:97271588-97271751 | CTATATTTTATTTTGTTTTTGTTCCCCAATTCCTTATTTTTTTCTTCTGCATTGCTGTTTCCCTTCCCCATTTCATCCTTTTCCCTGTGTGTTCACCTTCCCTTTCCTTGTCTTTTCCCAAATGCCCATTCCCTTCCCTGTCTTATCCTTTATTTTCCTTGTCC  🡪 TAGTTAACCTTTGCAGCATTTGTTTACAGTTTACAGTTCC  (U2AF2 binding site taken from Chr3:186506484-186506523) | 709-722 |
| BS3mut | Chr1:97271420-97271432 | ATGCTTTCCTTCC 🡪 AAGCTATCGTTAC | 705 |
