# Supplementary material for: In vitro iCLIP-based modeling uncovers how the splicing factor U2AF2 relies on regulation by cofactors
Source: HighWire-hosted journal article supplement (doi:10.1101/gr.229757.117), 2018-04-11
Supplement: Supplemental_Table_S7.xlsx [file Supplemental_Table_S7.xlsx]

## Sheet: Sheet1
Supplemental Table S7. Overview of all in vitro and in vivo iCLIP libraries. Numbering of all libraries used in the experiments are given as used in manuscript ("Library number") together with laboratory ID ("ID"). Experimental barcodes of the specific RT primers used in the experiments are indicated in "Barcode". Total number of sequenced reads are given for both in vivo and in vitro iCLIP along…
Library number	Technique	ID	Sample	Protein	Barcode	Sequencer	Sequenced reads	Uniquely mapped not spliced reads, duplicates removed	Reads length (bp)	Normalized file ID
1	in vivo iCLIP	imb_koenig_2015_12_01_JKRS13_Hela_RT30	wild type replicate 1	U2AF2	ATCG	Illumina HiSeq2500	70964159	18570826	68
2		LUJH23a_1-2	wild type replicate 2	U2AF2	TGGC, TTAA	Illumina HiSeq2500	122578584	61503646	100
3_1		previous_koenig_lujh32-combined_STAR_sample1	wild type replicate 3_1	U2AF2	GGTT	Illumina HiSeq2500	10297095	6146195	50
3_2		previous_koenig_lujh32-combined_STAR_sample2	wild type replicate 3_2	U2AF2	TGGC	Illumina HiSeq2500	36468141	23425123	50
3_3		previous_koenig_lujh32-combined_STAR_sample3	wild type replicate 3_3	U2AF2	CGGA	Illumina HiSeq2500	50677988	31813068	50
3_4		previous_koenig_lujh32-combined_STAR_sample4	wild type replicate 3_4	U2AF2	TTAA	Illumina HiSeq2500	21282295	12801316	50
4		LUJH21a_1-2	hnRNPC knockdown	U2AF2	TGGC, TTAA	Illumina HiSeq2500	113827010	74625356
		in vivoU2AF65 knockdown experiment
5		imb_koenig_2015_17_010307_JKRS17_control_KD_1	wild type replicate 1	U2AF2	CGAG	Illumina HiSeq + NextSeq500	103327650	35351663	109+75+75
6		imb_koenig_2015_17_010307_JKRS17_control_KD_2	wild type replicate 2	U2AF2	TTAA	Illumina HiSeq + NextSeq500	44980388	15189366	109+75+75
7		imb_koenig_2015_17_010307_JKRS17_control_KD_3	wild type replicate 3	U2AF2	GGTC	Illumina HiSeq + NextSeq500	43156697	15500883	109+75+75
8		imb_koenig_2015_17_010307_JKRS17_KD_1	U2AF65 knockdown replicate 1	U2AF2	CGCC	Illumina HiSeq + NextSeq500	76766321	26717285	109+75+75
9		imb_koenig_2015_17_010307_JKRS17_KD_2	U2AF65 knockdown replicate 2	U2AF2	AGAA	Illumina HiSeq + NextSeq500	56591024	19339960	109+75+75
10		imb_koenig_2015_17_010307_JKRS17_KD_3	U2AF65 knockdown replicate 3	U2AF2	TACG	Illumina HiSeq + NextSeq500	89689560	29552053	109+75+75
		hnRNPC in vivo iCLIP
11		lujh03_sample1-5	hnRNPC in vivo iCLIP	hnRNPC	GGTT, TTGT, CAAT, ACCT, GGCG	Illumina HiSeq2500	16599662	4422159	54
12		lujh25_sample1-9	hnRNPC in vivo iCLIP	hnRNPC	GGTT, TTGT, CAAT, CCGG, TGGC, GGTC, CGGA, GGCA, TTAA	Illumina HiSeq2500	20083189	9405884	50
	in vitro iCLIP	Kd titration experiment
13		imb_koenig_2014_03_11_JKRS14_00300nM	150nM U2AF65 replicate 1	U2AF2RRM12	GCGT	Ilumina MiSeq	1838308	N.A.	58	imb_koenig_2014_03_11_JKRS14_00300.se5N.plus.normalized.bw	imb_koenig_2014_03_11_JKRS14_00300.se5N.minus.normalized.bw
14		imb_koenig_2014_03_09_JKRS11_00300nM	150nM U2AF65 replicate 2	U2AF2RRM12	CGAG	Ilumina MiSeq	599605	N.A.	58	imb_koenig_2014_03_09_JKRS11_00300nM.se5N.plus.normalized.bw	imb_koenig_2014_03_09_JKRS11_00300nM.se5N.minus.normalized.bw
15		imb_koenig_2014_03_12_JKRS15_00300nM	150nM U2AF65 replicate 3	U2AF2RRM12	TTAA	Ilumina MiSeq	938184	N.A.	58	imb_koenig_2014_03_12_JKRS15_00300nM.se5N.plus.normalized.bw	imb_koenig_2014_03_12_JKRS15_00300nM.se5N.minus.normalized.bw
16		imb_koenig_2014_03_08_JKRS10_300	150nM U2AF65 replicate 4	U2AF2RRM12	GCGT	Ilumina MiSeq	2094123	N.A.	58	imb_koenig_2014_03_08_JKRS10_300.se5N.plus.normalized.bw	imb_koenig_2014_03_08_JKRS10_300.se5N.minus.normalized.bw
17		imb_koenig_2014_03_11_JKRS14_00500nM	250nM U2AF65 replicate 1	U2AF2RRM12	CACA	Ilumina MiSeq	1779070	N.A.	58	imb_koenig_2014_03_11_JKRS14_00500.se5N.plus.normalized.bw	imb_koenig_2014_03_11_JKRS14_00500.se5N.minus.normalized.bw
18		imb_koenig_2014_03_09_JKRS11_00500nM	250nM U2AF65 replicate 2	U2AF2RRM12	CACA	Ilumina MiSeq	2669020	N.A.	58	imb_koenig_2014_03_09_JKRS11_00500nM.se5N.plus.normalized.bw	imb_koenig_2014_03_09_JKRS11_00500nM.se5N.minus.normalized.bw
19		imb_koenig_2014_03_12_JKRS15_00500nM	250nM U2AF65 replicate 3	U2AF2RRM12	GCGT	Ilumina MiSeq	2060586	N.A.	58	imb_koenig_2014_03_12_JKRS15_00500nM.se5N.plus.normalized.bw	imb_koenig_2014_03_12_JKRS15_00500nM.se5N.minus.normalized.bw
20		imb_koenig_2014_03_08_JKRS10_00500nM	250nM U2AF65 replicate 4	U2AF2RRM12	ATCG	Ilumina MiSeq	63074	N.A.	58	imb_koenig_2014_03_08_JKRS10_500.se5N.plus.normalized.bw	imb_koenig_2014_03_08_JKRS10_500.se5N.minus.normalized.bw
21		imb_koenig_2014_03_11_JKRS14_00900nM	450nM U2AF65 replicate 1	U2AF2RRM12	ATAC	Ilumina MiSeq	962888	N.A.	58	imb_koenig_2014_03_11_JKRS14_00900.se5N.plus.normalized.bw	imb_koenig_2014_03_11_JKRS14_00900.se5N.minus.normalized.bw
22		imb_koenig_2014_03_12_JKRS15_00900nM	450nM U2AF65 replicate 3	U2AF2RRM12	GAAA	Ilumina MiSeq	916440	N.A.	58	imb_koenig_2014_03_12_JKRS15_00900nM.se5N.plus.normalized.bw	imb_koenig_2014_03_12_JKRS15_00900nM.se5N.minus.normalized.bw
23		imb_koenig_2014_03_08_JKRS10_900	450nM U2AF65 replicate 4	U2AF2RRM12	TACG	Ilumina MiSeq	62523	N.A.	58	imb_koenig_2014_03_08_JKRS10_900.se5N.plus.normalized.bw	imb_koenig_2014_03_08_JKRS10_900.se5N.minus.normalized.bw
24		imb_koenig_2014_03_11_JKRS14_01500nM	750nM U2AF65 replicate 1	U2AF2RRM12	TTAA	Ilumina MiSeq	1237609	N.A.	58	imb_koenig_2014_03_08_JKRS10_1500.se5N.plus.normalized.bw	imb_koenig_2014_03_08_JKRS10_1500.se5N.minus.normalized.bw
25		imb_koenig_2014_03_09_JKRS11_01500nM	750nM U2AF65 replicate 2	U2AF2RRM12	GCGT	Ilumina MiSeq	88537	N.A.	58	imb_koenig_2014_03_11_JKRS14_01500.se5N.plus.normalized.bw	imb_koenig_2014_03_11_JKRS14_01500.se5N.minus.normalized.bw
26		imb_koenig_2014_03_12_JKRS15_01500nM	750nM U2AF65 replicate 3	U2AF2RRM12	TATT	Ilumina MiSeq	1296244	N.A.	58	imb_koenig_2014_03_09_JKRS11_01500nM.se5N.plus.normalized.bw	imb_koenig_2014_03_09_JKRS11_01500nM.se5N.minus.normalized.bw
27		imb_koenig_2014_03_08_JKRS10_1500	750nM U2AF65 replicate 4	U2AF2RRM12	CGAG	Ilumina MiSeq	51634	N.A.	58	imb_koenig_2014_03_12_JKRS15_01500nM.se5N.plus.normalized.bw	imb_koenig_2014_03_12_JKRS15_01500nM.se5N.minus.normalized.bw
28		imb_koenig_2014_03_11_JKRS14_03000nM	1.5µM U2AF65 replicate 1	U2AF2RRM12	TATT	Ilumina MiSeq	1544398	N.A.	58	imb_koenig_2014_03_11_JKRS14_03000.se5N.plus.normalized.bw	imb_koenig_2014_03_11_JKRS14_03000.se5N.minus.normalized.bw
29		imb_koenig_2014_03_09_JKRS11_03000nM	1.5µM U2AF65 replicate 2	U2AF2RRM12	AGAA	Ilumina MiSeq	468774	N.A.	58	imb_koenig_2014_03_09_JKRS11_03000nM.se5N.plus.normalized.bw	imb_koenig_2014_03_09_JKRS11_03000nM.se5N.minus.normalized.bw
30		imb_koenig_2014_03_12_JKRS15_03000nM	1.5µM U2AF65 replicate 3	U2AF2RRM12	ATAC	Ilumina MiSeq	756311	N.A.	58	imb_koenig_2014_03_12_JKRS15_03000nM.se5N.plus.normalized.bw	imb_koenig_2014_03_12_JKRS15_03000nM.se5N.minus.normalized.bw
31		imb_koenig_2014_03_11_JKRS14_06000nM	3µM U2AF65 replicate 1	U2AF2RRM12	CGAG	Ilumina MiSeq	2823055	N.A.	58	imb_koenig_2014_03_11_JKRS14_06000.se5N.plus.normalized.bw	imb_koenig_2014_03_11_JKRS14_06000.se5N.minus.normalized.bw
32		imb_koenig_2014_03_09_JKRS11_06000nM	3µM U2AF65 replicate 2	U2AF2RRM12	ATAC	Ilumina MiSeq	363561	N.A.	58	imb_koenig_2014_03_09_JKRS11_06000nM.se5N.plus.normalized.bw	imb_koenig_2014_03_09_JKRS11_06000nM.se5N.minus.normalized.bw
33		imb_koenig_2014_03_12_JKRS15_06000nM	3µM U2AF65 replicate 3	U2AF2RRM12	CGCC	Ilumina MiSeq	2094586	N.A.	58	imb_koenig_2014_03_12_JKRS15_06000nM.se5N.plus.normalized.bw	imb_koenig_2014_03_12_JKRS15_06000nM.se5N.minus.normalized.bw
34		imb_koenig_2014_03_08_JKRS10_6000	3µM U2AF65 replicate 4	U2AF2RRM12	CGCC	Ilumina MiSeq	4750031	N.A.	58	imb_koenig_2014_03_08_JKRS10_6000.se5N.plus.normalized.bw	imb_koenig_2014_03_08_JKRS10_6000.se5N.minus.normalized.bw
35		imb_koenig_2014_03_11_JKRS14_10000nM	5µM U2AF65 replicate 1	U2AF2RRM12	AGAA	Ilumina MiSeq	2104006	N.A.	58	imb_koenig_2014_03_11_JKRS14_10000.se5N.plus.normalized.bw	imb_koenig_2014_03_11_JKRS14_10000.se5N.minus.normalized.bw
36		imb_koenig_2014_03_09_JKRS11_10000nM	5µM U2AF65 replicate 2	U2AF2RRM12	GAAA	Ilumina MiSeq	188650	N.A.	58	imb_koenig_2014_03_09_JKRS11_10000nM.se5N.plus.normalized.bw	imb_koenig_2014_03_09_JKRS11_10000nM.se5N.minus.normalized.bw
37		imb_koenig_2014_03_12_JKRS15_10000nM	5µM U2AF65 replicate 3	U2AF2RRM12	ATCG	Ilumina MiSeq	1890224	N.A.	58	imb_koenig_2014_03_12_JKRS15_10000nM.se5N.plus.normalized.bw	imb_koenig_2014_03_12_JKRS15_10000nM.se5N.minus.normalized.bw
38		imb_koenig_2014_03_08_JKRS10_10000	5µM U2AF65 replicate 4	U2AF2RRM12	ATAC	Ilumina MiSeq	2149896	N.A.	58	imb_koenig_2014_03_08_JKRS10_10000.se5N.plus.normalized.bw	imb_koenig_2014_03_08_JKRS10_10000.se5N.minus.normalized.bw
39		imb_koenig_2014_03_11_JKRS14_30000nM	15µM U2AF65 replicate 1	U2AF2RRM12	CGCC	Ilumina MiSeq	502426	N.A.	58	imb_koenig_2014_03_11_JKRS14_30000.se5N.plus.normalized.bw	imb_koenig_2014_03_11_JKRS14_30000.se5N.minus.normalized.bw
40		imb_koenig_2014_03_09_JKRS11_30000nM	15µM U2AF65 replicate 2	U2AF2RRM12	CGCC	Ilumina MiSeq	28285	N.A.	58	imb_koenig_2014_03_09_JKRS11_30000nM.se5N.plus.normalized.bw	imb_koenig_2014_03_09_JKRS11_30000nM.se5N.minus.normalized.bw
41		imb_koenig_2014_03_12_JKRS15_30000nM	15µM U2AF65 replicate 3	U2AF2RRM12	CGAG	Ilumina MiSeq	1505983	N.A.	58	imb_koenig_2014_03_12_JKRS15_30000nM.se5N.plus.normalized.bw	imb_koenig_2014_03_12_JKRS15_30000nM.se5N.minus.normalized.bw
42		imb_koenig_2014_03_08_JKRS10_30000	15µM U2AF65 replicate 4	U2AF2RRM12	CACA	Ilumina MiSeq	77754	N.A.	58	imb_koenig_2014_03_08_JKRS10_30000.se5N.plus.normalized.bw	imb_koenig_2014_03_08_JKRS10_30000.se5N.minus.normalized.bw
43		imb_koenig_2014_03_08_JKRS10_50000	25µM U2AF65 replicate 4	U2AF2RRM12	AGAA	Ilumina MiSeq	787811	N.A.	58	imb_koenig_2014_03_08_JKRS10_50000.se5N.plus.normalized.bw	imb_koenig_2014_03_08_JKRS10_50000.se5N.minus.normalized.bw
		in vitro iCLIP co-factor experiments
44		imb_koenig_2016_01_02_JKRS21_HCvsU2_200nM	1µM U2AF65 200nM hnRNPC1 replicate 1	U2AF2RRM12	CGCC	Ilumina MiSeq	1591776	N.A.	75	SOB_nup_norm_imb_koenig_2016_01_02_JKRS21_HCvsU2_200nM.trimmedAdap.trimmedBC.sorted.100000.sorted_duprm.se5N.plus.bedgraph
45		imb_koenig_2016_01_05_JKRS24_200nM_hnRNPCvsU2AF65	1µM U2AF65 200nM hnRNPC1 replicate 2	U2AF2RRM12	AGAA	Ilumina MiSeq	1652761	N.A.	75	SOB_nup_norm_imb_koenig_2016_01_05_JKRS24_200nM_hnRNPCvsU2AF65.trimmedAdap.trimmedBC.sorted.100000.sorted_duprm.se5N.plus.bedgraph
46		imb_koenig_2016_01_02_JKRS21_HCvsU2_500nM	1µM U2AF65 500nM hnRNPC1 replicate 1	U2AF2RRM12	ATCG	Ilumina MiSeq	357464	N.A.	75	SOB_nup_norm_imb_koenig_2016_01_02_JKRS21_HCvsU2_500nM.trimmedAdap.trimmedBC.sorted.100000.sorted_duprm.se5N.plus.bedgraph
47		imb_koenig_2016_01_05_JKRS24_500nM_hnRNPCvsU2AF65	1µM U2AF65 500nM hnRNPC1 replicate 2	U2AF2RRM12	TACG	Ilumina MiSeq	1726147	N.A.	75	SOB_nup_norm_imb_koenig_2016_01_05_JKRS24_500nM_hnRNPCvsU2AF65.trimmedAdap.trimmedBC.sorted.100000.sorted_duprm.se5N.plus.bedgraph
48		imb_koenig_2016_01_02_JKRS21_HCvsU2_1000nM	1µM U2AF65 1µM hnRNPC1 replicate 1	U2AF2RRM12	AGAA	Ilumina MiSeq	1206155	N.A.	75	SOB_nup_norm_imb_koenig_2016_01_02_JKRS21_HCvsU2_1000nM.trimmedAdap.trimmedBC.sorted.100000.sorted_duprm.se5N.plus.bedgraph
49		imb_koenig_2016_01_05_JKRS24_1000nM_hnRNPCvsU2AF65	1µM U2AF65 1µM hnRNPC1 replicate 2	U2AF2RRM12	GAAA	Ilumina MiSeq	2165824	N.A.	75	SOB_nup_norm_imb_koenig_2016_01_05_JKRS24_1000nM_hnRNPCvsU2AF65.trimmedAdap.trimmedBC.sorted.100000.sorted_duprm.se5N.plus.bedgraph
50		imb_koenig_2016_01_06_JKRS28_HNRNPC_1	500nM U2AF65 200nM hnRNPC1 replicate 1	U2AF2RRM12	TACG	Ilumina MiSeq	1606706	N.A.	75	SOB_nup_norm_imb_koenig_2016_01_06_JKRS28_HNRNPC_1.trimmedAdap.trimmedBC.sorted.100000.sorted_duprm.se5N.plus.bedgraph
51		imb_koenig_2016_01_06_JKRS28_HNRNPC_2	500nM U2AF65 200nM hnRNPC1 replicate 2	U2AF2RRM12	GCGT	Ilumina MiSeq	1338195	N.A.	75	SOB_nup_norm_imb_koenig_2016_01_06_JKRS28_HNRNPC_2.trimmedAdap.trimmedBC.sorted.100000.sorted_duprm.se5N.plus.bedgraph
52		imb_koenig_2016_01_06_JKRS28_PTBP1_1	500nM U2AF65 200nM PTBP1 replicate 1	U2AF2RRM12	GGTC	Ilumina MiSeq	472731	N.A.	75	SOB_nup_norm_imb_koenig_2016_01_06_JKRS28_PTBP1_1.trimmedAdap.trimmedBC.sorted.100000.sorted_duprm.se5N.plus.bedgraph
53		imb_koenig_2016_01_06_JKRS28_PTBP1_2	500nM U2AF65 200nM PTBP1 replicate 2	U2AF2RRM12	CGAG	Ilumina MiSeq	1028069	N.A.	75	SOB_nup_norm_imb_koenig_2016_01_06_JKRS28_PTBP1_2.trimmedAdap.trimmedBC.sorted.100000.sorted_duprm.se5N.plus.bedgraph
54		imb_koenig_2016_01_04_JKRS22_PCBP1	500nM U2AF65 500nM PCBP1 replicate 1	U2AF2RRM12	CACA	Ilumina MiSeq	2025476	N.A.	75	SOB_nup_norm_imb_koenig_2016_01_04_JKRS22_PCBP1.trimmedAdap.trimmedBC.sorted.100000.sorted_duprm.se5N.plus.bedgraph
55		imb_koenig_2016_01_05_JKRS24_PCBP1vsU2AF65	500nM U2AF65 500nM PCBP1 replicate 2	U2AF2RRM12	CACA	Ilumina MiSeq	1698500	N.A.	75	SOB_nup_norm_imb_koenig_2016_01_05_JKRS24_PCBP1vsU2AF65.trimmedAdap.trimmedBC.sorted.100000.sorted_duprm.se5N.plus.bedgraph
56		imb_koenig_2016_01_04_JKRS22_FUBP1	500nM U2AF65 500nM FUBP1 replicate 1	U2AF2RRM12	ATAC	Ilumina MiSeq	902454	N.A.	75	SOB_nup_norm_imb_koenig_2016_01_04_JKRS22_FUBP1.trimmedAdap.trimmedBC.sorted.100000.sorted_duprm.se5N.plus.bedgraph
57		imb_koenig_2016_01_05_JKRS24_FUBP1vsU2AF65	500nM U2AF65 500nM FUBP1 replicate 2	U2AF2RRM12	GCGT	Ilumina MiSeq	1915052	N.A.	75	SOB_nup_norm_imb_koenig_2016_01_05_JKRS24_FUBP1vsU2AF65.trimmedAdap.trimmedBC.sorted.100000.sorted_duprm.se5N.plus.bedgraph
58		imb_koenig_2016_01_01_JKRS20_SNRPA	500nM U2AF65 500nM SNRPA replicate 1	U2AF2RRM12	CACA	Ilumina MiSeq	1741386	N.A.	75	SOB_nup_norm_imb_koenig_2016_01_01_JKRS20_SNRPA1.trimmedAdap.trimmedBC.sorted.100000.sorted_duprm.se5N.plus.bedgraph
59		imb_koenig_2016_01_04_JKRS22_SNRPA	500nM U2AF65 500nM SNRPA replicate 2	U2AF2RRM12	CGAG	Ilumina MiSeq	1933105	N.A.	75	SOB_nup_norm_imb_koenig_2016_01_04_JKRS22_SNRPA.trimmedAdap.trimmedBC.sorted.100000.sorted_duprm.se5N.plus.bedgraph
60		imb_koenig_2016_01_01_JKRS20_RBM24	500nM U2AF65 500nM RBM24 replicate 1	U2AF2RRM12	GGTC	Ilumina MiSeq	911358	N.A.	75	SOB_nup_norm_imb_koenig_2016_01_01_JKRS20_RBM24.trimmedAdap.trimmedBC.sorted.100000.sorted_duprm.se5N.plus.bedgraph
61		imb_koenig_2016_01_06_JKRS28_RBM24	500nM U2AF65 500nM RBM24 replicate 2	U2AF2RRM12	CGCC	Ilumina MiSeq	1061559	N.A.	75	SOB_nup_norm_imb_koenig_2016_01_06_JKRS28_RBM24.trimmedAdap.trimmedBC.sorted.100000.sorted_duprm.se5N.plus.bedgraph
62		imb_koenig_2016_01_04_JKRS22_ELAVL1	500nM U2AF65 114nM ELAVL1 replicate 1	U2AF2RRM12	TTAA	Ilumina MiSeq	672209	N.A.	75	SOB_nup_norm_imb_koenig_2016_01_04_JKRS22_ELAVL1.trimmedAdap.trimmedBC.sorted.100000.sorted_duprm.se5N.plus.bedgraph
63		imb_koenig_2016_01_06_JKRS28_ELAVL1	500nM U2AF65 114nM ELAVL1 replicate 2	U2AF2RRM12	TTAA	Ilumina MiSeq	1367202	N.A.	75	SOB_nup_norm_imb_koenig_2016_01_06_JKRS28_ELAVL1.trimmedAdap.trimmedBC.sorted.100000.sorted_duprm.se5N.plus.bedgraph
64		imb_koenig_2016_01_04_JKRS22_BRUNOL6	500nM U2AF65 280nM BRUNOL6 replicate 1	U2AF2RRM12	GAAA	Ilumina MiSeq	2384484	N.A.	75	SOB_nup_norm_imb_koenig_2016_01_04_JKRS22_BRUNOL6.trimmedAdap.trimmedBC.sorted.100000.sorted_duprm.se5N.plus.bedgraph
65		imb_koenig_2016_01_04_JKRS22_RBM41	500nM U2AF65 288nM RBM41 replicate 1	U2AF2RRM12	GCGT	Ilumina MiSeq	1355216	N.A.	75	SOB_nup_norm_imb_koenig_2016_01_04_JKRS22_RBM41.trimmedAdap.trimmedBC.sorted.100000.sorted_duprm.se5N.plus.bedgraph
66		imb_koenig_2016_01_05_JKRS24_RBM41vsU2AF65	500nM U2AF65 288nM RBM41 replicate 2	U2AF2RRM12	CGCC	Ilumina MiSeq	1102737	N.A.	75	SOB_nup_norm_imb_koenig_2016_01_05_JKRS24_RBM41vsU2AF65.trimmedAdap.trimmedBC.sorted.100000.sorted_duprm.se5N.plus.bedgraph
67		imb_koenig_2016_01_01_JKRS20_MBNL1	500nM U2AF65 500nM MBNL1 replicate 1	U2AF2RRM12	ATCG	Ilumina MiSeq	1601421	N.A.	75	SOB_nup_norm_imb_koenig_2016_01_01_JKRS20_MBNL1.trimmedAdap.trimmedBC.sorted.100000.sorted_duprm.se5N.plus.bedgraph
68		imb_koenig_2016_01_06_JKRS28_MBNL1	500nM U2AF65 500nM MBNL1 replicate 2	U2AF2RRM12	ATCG	Ilumina MiSeq	834813	N.A.	75	SOB_nup_norm_imb_koenig_2016_01_06_JKRS28_MBNL1.trimmedAdap.trimmedBC.sorted.100000.sorted_duprm.se5N.plus.bedgraph
69		imb_koenig_2016_01_01_JKRS20_KHDRBS1	500nM U2AF65 213nM KHDRBS1 replicate 1	U2AF2RRM12	GAAA	Ilumina MiSeq	1585555	N.A.	75	SOB_nup_norm_imb_koenig_2016_01_01_JKRS20_KHDRBS1.trimmedAdap.trimmedBC.sorted.100000.sorted_duprm.se5N.plus.bedgraph
70		imb_koenig_2016_01_06_JKRS28_KHDRBS1	500nM U2AF65 213nM KHDRBS1 replicate 2	U2AF2RRM12	TATT	Ilumina MiSeq	1326703	N.A.	75	SOB_nup_norm_imb_koenig_2016_01_06_JKRS28_KHDRBS1.trimmedAdap.trimmedBC.sorted.100000.sorted_duprm.se5N.plus.bedgraph
71		imb_koenig_2016_01_06_JKRS28_BSA_1	500nM U2AF65 500nM BSA replicate 1	U2AF2RRM12	ATAC	Ilumina MiSeq	1010122	N.A.	75	SOB_nup_norm_imb_koenig_2016_01_06_JKRS28_BSA_1.trimmedAdap.trimmedBC.sorted.100000.sorted_duprm.se5N.plus.bedgraph
72		imb_koenig_2016_01_06_JKRS28_BSA_2	500nM U2AF65 500nM BSA replicate 2	U2AF2RRM12	CACA	Ilumina MiSeq	2286439	N.A.	75	SOB_nup_norm_imb_koenig_2016_01_06_JKRS28_BSA_2.trimmedAdap.trimmedBC.sorted.100000.sorted_duprm.se5N.plus.bedgraph
73		imb_koenig_2016_01_01_JKRS20_U2AF65RRM12	500nM U2AF65 replicate 1	U2AF2RRM12	TTAA	Ilumina MiSeq	516571	N.A.	75	SOB_nup_norm_imb_koenig_2016_01_01_JKRS20_U2AF65RRM12.trimmedAdap.trimmedBC.sorted.100000.sorted_duprm.se5N.plus.bedgraph
74		imb_koenig_2016_01_04_JKRS22_U2AF65RRM12_1	500nM U2AF65 replicate 2	U2AF2RRM12	CGCC	Ilumina MiSeq	2544262	N.A.	75	SOB_nup_norm_imb_koenig_2016_01_04_JKRS22_U2AF65RRM12_1.trimmedAdap.trimmedBC.sorted.100000.sorted_duprm.se5N.plus.bedgraph
75		imb_koenig_2016_01_04_JKRS22_U2AF65RRM12_2	500nM U2AF65 replicate 3	U2AF2RRM12	ATCG	Ilumina MiSeq	949587	N.A.	75	SOB_nup_norm_imb_koenig_2016_01_04_JKRS22_U2AF65RRM12_2.trimmedAdap.trimmedBC.sorted.100000.sorted_duprm.se5N.plus.bedgraph
76		imb_koenig_2016_01_05_JKRS24_500nM_U2AF65	500nM U2AF65 replicate 4	U2AF2RRM12	TATT	Ilumina MiSeq	935505	N.A.	75	SOB_nup_norm_imb_koenig_2016_01_05_JKRS24_500nM_U2AF65.trimmedAdap.trimmedBC.sorted.100000.sorted_duprm.se5N.plus.bedgraph
77		imb_koenig_2016_01_06_JKRS28_U2AF65	500nM U2AF65 replicate 5	U2AF2RRM12	AGAA	Ilumina MiSeq	796401	N.A.	75	SOB_nup_norm_imb_koenig_2016_01_06_JKRS28_U2AF65.trimmedAdap.trimmedBC.sorted.100000.sorted_duprm.se5N.plus.bedgraph
78		imb_koenig_2016_01_02_JKRS21_U2AF65FL	500nM U2AF65 full length	U2AF2full-length	GAAA	Ilumina MiSeq	2109355	N.A.	75	imb_koenig_2016_01_02_JKRS21_U2AF65FL.se5N.plus.bw
79		imb_koenig_2016_01_02_JKRS21_U2AF65RRM12	1µM U2AF65 replicate 1	U2AF2RRM12	TTAA	Ilumina MiSeq	3238866	N.A.	75	SOB_nup_norm_imb_koenig_2016_01_02_JKRS21_U2AF65RRM12.trimmedAdap.trimmedBC.sorted.100000.sorted_duprm.se5N.plus.bedgraph
80		imb_koenig_2016_01_05_JKRS24_1uM_U2AF65	1µM U2AF65 replicate 2	U2AF2RRM12	TTAA	Ilumina MiSeq	1120514	N.A.	75	SOB_nup_norm_imb_koenig_2016_01_05_JKRS24_1uM_U2AF65.trimmedAdap.trimmedBC.sorted.100000.sorted_duprm.se5N.plus.bedgraph
