# Supplementary material for: In vitro iCLIP-based modeling uncovers how the splicing factor U2AF2 relies on regulation by cofactors
Source: HighWire-hosted journal article supplement (doi:10.1101/gr.229757.117), 2018-04-11
Supplement: Supplemental_Table_S8.docx [file Supplemental_Table_S8.docx]

**Supplemental Table S8.** **siRNAs used in the knockdown experiments.** siRNAs were purchased from different companies (Source, ID) as single or pooled siRNAs. For each siRNA, the sequence is given together with the concentration (in nM) that was used for knockdown experiments in HeLa cells (**Figs. 6C,D, 7A**).

| **Target gene** | **Source** | **ID** | **Sequence** | **Conc. (nM)** |
| --- | --- | --- | --- | --- |
| *U2AF2* | ON-TARGET Plus SMARTpool siRNA Dharmacon | L-012380-02-0005 | CGGUAGGAACAUAGCGUGU | 5 |
| CCAUGCAAGCUGCGGGUCA |
| AGGAGAACCGGCAUCGGAA |
| GCGGCAGCUCAACGAGAAU |
| *hnRNPC* | single siRNA Invitrogen | HNRNPCHSS179305 | AAGCAGUAGAGAUGAAGAAUGAUAA | 5 |
| *PTBP1* | ON-TARGET Plus SMARTpool siRNA Dharmacon | L-003528-00 | CGUCAAAGGAUUCAAGUUC | 5 |
| GGCACAAGCUGCACGGGAA |
| GAACUUCCAGAACAUAUUC |
| GCAUCACGCUCUCGAAGCA |
| *PTBP2* | ON-TARGET Plus SMARTpool siRNA Dharmacon | L-021323-01 | GAGAGGAUCUGACGAACUA | 5 |
| UGACAUGACUUACGUGCAU |
| GGAACUAGCAACCGAGGAA |
| AGAAGAGGAUCUACGAACA |
| *CELF6* | MISSION pre-designed siRNA Sigma | SASI_Hs01_00205595 | GGAGUUUGGUGAUGCGGAA | 20 |
| *MBNL1* | MISSION pre-designed siRNA Sigma | SASI_Hs02_00354513 | GCAACAACAUCUGCCACAA | 20 |
| *ELAVL1* | MISSION pre-designed siRNA Sigma | SASI_Hs01_00049654 | GGCUUGAGGCUCCAGUCAA | 20 |
| *FUBP1* | custom siRNA | - | CUGGAACACCUGAAUCUGU | 20 |
| *SNRPA* | MISSION pre-designed siRNA Sigma | SASI_Hs01_00224233 | GAUAUCAUUGCCAAGAUGA | 20 |
| *KHDRBS1* | MISSION pre-designed siRNA Sigma | SASI_Hs01_00219781 | CAUAUGAAGAAUAUGGAUA | 20 |
| *RBM24* | MISSION pre-designed siRNA Sigma | SASI_Hs01_00094931 | GCAAUAUGUAGCUUGAAUU | 20 |
| *RBM41* | MISSION pre-designed siRNA Sigma | SASI_Hs01_00218259 | CAGAAAUCUUGAUCUGGAA | 20 |
| *PCBP1* | MISSION pre-designed siRNA Sigma | SASI_Hs01_00034329 | CGGUUAAGAGGAUCCGCGA | 20 |
| control | custom siRNA | - | UGGUUUACAUGUCGACUAA | 20 |
