# Supplementary material for: In vitro iCLIP-based modeling uncovers how the splicing factor U2AF2 relies on regulation by cofactors
Source: HighWire-hosted journal article supplement (doi:10.1101/gr.229757.117), 2018-04-11
Supplement: Supplemental_Table_S9.docx [file Supplemental_Table_S9.docx]

**Supplemental Table S9. Oligonucleotides used in this study.** Sequence of all primers used to check RBP knockdowns, to measure alternative exon inclusion, to construct mutated minigene constructs and to prepare iCLIP libraries (“Comment”).

| **Primer name** | **Sequence** | **Comment** |
| --- | --- | --- |
| fw_PCBP1 | AAGACTTGACCACGTAACGAG | qPCR for *PCBP1* KD |
| rev_PCBP1 | ATGCTTCCTACTTCCTTTCCG | qPCR for *PCBP1* KD |
| fw_FUBP1 | ACGGGCTGGAGTTAAAATGG | qPCR for *FUBP1* KD |
| rev_FUBP1 | TCTCTGAAACCGCCTTGATC | qPCR for *FUBP1* KD |
| fw_SNRPA | ATCTTGTTCCTCACCAACCTG | qPCR for *SNRPA* KD |
| rev_SNRPA | ACCTCATTGTCAAACTCCACG | qPCR for *SNRPA* KD |
| fw_RBM41 | CCAAGCGACTTCTCTCATATC | qPCR for *RBM41* KD |
| rev_RBM41 | CATCCAGGACCCACAATTTA | qPCR for *RBM41* KD |
| RBM24_fw1 | AAAGACCTTTCGGGATACCTGC | qPCR for *RBM24* KD |
| RBM24_rv1 | TGCGTATGCAGCTCCAGTG | qPCR for *RBM24* KD |
| CELF6_fw1 | TCCCCTTATCCAGCCCAGAG | qPCR for *CELF6* KD |
| CELF6_rv1 | TAGTGGTGCATCCCAGCGTA | qPCR for *CELF6* KD |
| MBNL1_fw1 | CCCAGCAAATGCAACTAGCC | qPCR for *MBNL1* KD |
| MBNL1_rv1 | ACTGAAAACATTGGCACGGG | qPCR for *MBNL1* KD |
| ELAVL1_fw1 | CATTAAGGTGTCGTATGCTCGC | qPCR for *ELAVL1* KD |
| ELAVL1_rv1 | GAGCCCGCTGATGTACAAGT | qPCR for *ELAVL1* KD |
| KHDRBS1_fw1 | AGAGTCAAGGGGAGTCAGAGT | qPCR for *KHDRBS1* KD |
| KHDRBS1_rv1 | AGTGATGGCCTGGTCCCATT | qPCR for *KHDRBS1* KD |
| HNRNPC_fw1 | GAACCCGGGAGTAGGAGACT | qPCR for *HNRNPC* KD |
| HNRNPC_rev1 | AGCCGAAAATGTAGCTGAAGA | qPCR for *HNRNPC* KD |
| nPTB_fwd | GCAATACAGTCCTGTTGGTTAG | *PTBP2* exon inclusion |
| nPTB_rev | GATTGGTTTCCATCAGCCATCT | *PTBP2* exon inclusion |
| fw_CD55 | TCAGGTACTACCCGTCTTCTATC | *CD55* inclusion |
| rev_CD55 | GGAACAGTCTGTATACTTGTGTGTA | *CD55* inclusion |
| fw_PCBP2 | TTGACCAAGCTGCACCAG | *PCBP2* inclusion |
| rev_PCBP2 | TCGTTTGGAATGGTGAGTTCAT | *PCBP2* inclusion |
| fw_MYL6 | CAGCAATGGTTGTATCAACTATGAA | *MYL6* inclusion |
| rev_MYL6 | GGAAAGTTGCTGAGACAAGAAAG | *MYL6* inclusion |

*(continued on next page)*

*(continued from previous page)*

| **Primer name** | **Sequence** | **Comment** |
| --- | --- | --- |
| fw_ptbp2_mut1 | ACGCAATGTTGAGATGAAATGCTGTAATTTAC | construct BS3mut |
| rev_ptbp2_mut1 | TGCATTGCATGCATAGGAATTTTAAACTTTG | construct BS3mut |
| fw_ptbp2_del | TTGTCTTCATTCCCTGTC | construct BS2del |
| rev_ptbp2_del | TCAGTACATAGGAAATGCAG | construct BS2del |
| fw_ptbp2_del4 | ACGCTGCTTGCTCTTCTC | construct BS1del |
| rev_ptbp2_del4 | GATGAACAGATCATCCATAACG | construct BS1del |
| fw_ptbp2_subs1 | TGTTTACAGTTTACAGTTCCTTGTCTTCATTCCCTGTC | construct BS2sub |
| rev_ptbp2_subs1 | AATGCTGCAAAGGTTAACTATCAGTACATAGGAAATGC | construct BS2sub |
| rev_vector_  minigene | GCAACTAGAAGGCACAGTCG | *PTBP2* in minigene |
| RT_primer_  iCLIP | NNAACCNNNAGATCGGAAGAGCGTCGTGGATCCTGAACCGC | reverse transcription during *in vivo* and *in vitro* iCLIP library preparation |
